# Supplementary material for: Highly enantioselective direct aldol reaction catalyzed by cinchona derived primary amines
Source: Royal Society of Chemistry journal article supplement (doi:10.1039/b711164a), 2007-01-01
Supplement: b711164a.pdf [file b711164a.pdf]

**Supporting Information for  
Highly Enantioselective Direct Aldol Reaction Catalyzed By Cinchona  
Derived Primary Amines**

Bao-Lei Zheng, Quan-Zhong Liu,\* Chuan-Sheng Guo, Xue-Lian Wang and Long  
He

*Key Laboratory of Chemistry Application and Pollution Controlment of College of Chemistry and Chemical  
Engineering, China West Normal University, Nanchong, 637002, China*

*quanzhongliu@sohu.com*

**Table of Contents**

|                                                           |         |
|-----------------------------------------------------------|---------|
| General information.....                                  | S2      |
| General procedure for the Aldol reaction.....             | S2      |
| Optimization of Conditions.....                           | S2-S4   |
| Spectra data for all the Aldol products <b>5a-p</b> ..... | S4-S7   |
| NMR spectra for compounds <b>5a-p</b> .....               | S8-S15  |
| HPLC spectra for compounds <b>5a-p</b> .....              | S16-S31 |

## Experimental Section

**General Information:** Unless otherwise noted, material were purchased from commercial suppliers and used without further purification. cyclohexanone and cyclopentanone were freshly distilled. Hexane and ethyl acetate for flash column chromatography were distilled before use. Flash column chromatography was performed using 200-300 mesh silica gel. <sup>1</sup>H NMR spectra were recorded on a Bruker-300 (300 MHz) spectrophotometer. Chemical shifts are reported in ppm from the solvent resonance as the internal standard (CDCl<sub>3</sub>: 7.26 ppm). Data are reported as follows: chemical shift, multiplicity (s = single, d = doublet, t = triplet, q = quartet, br = broad, m = multiplet), coupling constants (Hz) and integration. Chiral HPLC was performed on Waters 2996 series with chiral columns (Chirapak AD-H, AS-H, OD-H columns, Daicel Chemical Ind., Ltd.). Catalysts **1** and **2** were prepared according to literature procedure<sup>1</sup>

### General procedure for the Aldol reaction

To a mixture of catalyst **1** (0.025 mmol) and TfOH (0.0375 mmol) was added Cyclohexanone (1 mL), cyclopentanone (1 mL), tetrahydro-4H-puran-4-one (1.25 mmol) or tetrahydrothiopuran-4-one (0.50 mmol). The reaction mixture was stirred for 5 min in a closed system and then aldehyde (0.25 mmol) was added. The reaction mixture was stirred for 9-166 h (monitored by TLC). the reaction was quenched with saturated ammonium chloride solution (10 mL) and extracted with ethyl acetate (3 × 15 mL). The combined organic layer was dried (Na<sub>2</sub>SO<sub>4</sub>) and concentrated in vacuo. The crude product was purified by flash column chromatography to give pure aldol adduct. Diastereoselectivity was determined by <sup>1</sup>H NMR analysis of the crude aldol product.

### Optimization of Conditions:

#### Acid and Acid loading screening:

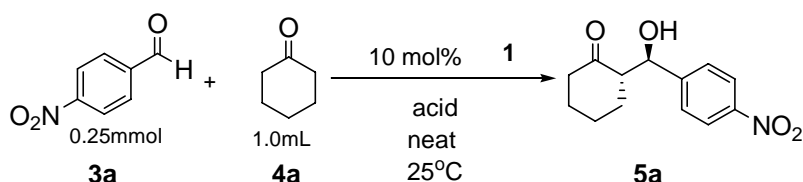

| entry          | acid    | Time(h) | Acid(%) | Yield(%) <sup>a</sup> | Ee(%) | dr    |
|----------------|---------|---------|---------|-----------------------|-------|-------|
| 1              | TFA     | 19      | 15      | 54.8                  | 95    | 6.8:1 |
| 2              | No acid | 39      | 0       | 74                    | 87    | 1.6:1 |
| 3              | TfOH    | 18      | 5       | 99                    | 98    | 6.3:1 |
| 4              | TfOH    | 12      | 10      | 97                    | 98    | 6.9:1 |
| 5              | TfOH    | 9       | 15      | 99                    | 99    | 9.2:1 |
| 6              | TfOH    | 15      | 20      | 77                    | 98    | 9.0:1 |
| 7 <sup>b</sup> | TfOH    | 18      | 15      | 76                    | -94   | 10:1  |

<sup>a</sup> isolated yields. <sup>b</sup> 10% **2** used as catalyst

<sup>1</sup> Brunner, H.; Biigler, J.; Nuber, B. *Tetrahedron: Asymmetry*, **1995**, *6*, 1699-1702.

### Solvent screening:

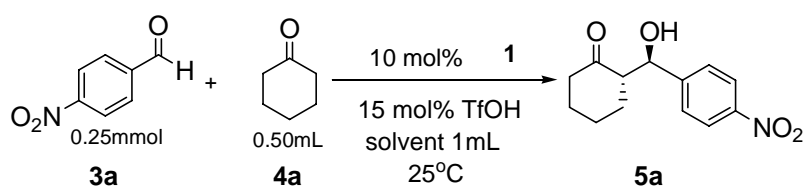

| entry           | solvent                         | Time(h) | Yield(%) <sup>a</sup> | Ee(%) | dr    |
|-----------------|---------------------------------|---------|-----------------------|-------|-------|
| 1               | neat                            | 9       | 99                    | 99    | 9.2:1 |
| 2               | THF                             | 17      | 98                    | 99    | 9.8:1 |
| 3               | DMSO                            | 45      | 77                    | 97    | 3.5:1 |
| 4               | DMF                             | 44      | 74                    | 97    | 5.0:1 |
| 5               | Toluene                         | 23      | 94                    | 98    | 8.6:1 |
| 6               | H <sub>2</sub> O                | 4       | 97                    | 97    | 4.8:1 |
| 7               | CHCl <sub>3</sub>               | 22      | 84                    | 98    | 7.0:1 |
| 8               | EtOH                            | 20      | 79                    | 98    | 6.6:1 |
| 9               | CH <sub>2</sub> Cl <sub>2</sub> | 12      | 82                    | 98    | 7.5:1 |
| 10              | Et <sub>2</sub> O               | 19      | 98                    | 98    | 8.1:1 |
| 11 <sup>b</sup> | DMF-H <sub>2</sub> O            | 24      | 94                    | 97    | 4.1:1 |
| 12 <sup>c</sup> | neat                            | 96      | 11                    | 91    | 2.4:1 |
| 13 <sup>d</sup> | neat                            | 38      | 90                    | 98    | 5.0:1 |
| 14 <sup>e</sup> | neat                            | 18      | 86                    | 92    | 2.0:1 |
| 15 <sup>f</sup> | neat                            | 18      | 73                    | 86    | 1.7:1 |

<sup>a</sup> isolated yields. <sup>b</sup> volume ratio 1:1. <sup>c</sup> the reaction was carried out at -16°C. <sup>d</sup> the reaction was carried out at 0°C. <sup>e</sup> the reaction was carried out at 40°C. <sup>f</sup> the reaction was carried out at 60°C.

### Full list of substrates

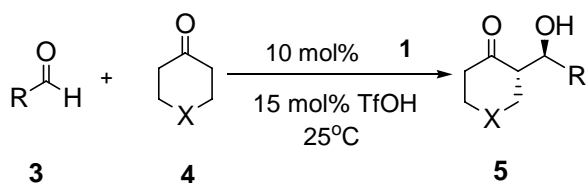

| entry | R                                               | X               | Time(h) | Yield(%) <sup>a</sup> | Ee(%) | dr    |
|-------|-------------------------------------------------|-----------------|---------|-----------------------|-------|-------|
| 1     | 4-NO <sub>2</sub> C <sub>6</sub> H <sub>4</sub> | CH <sub>2</sub> | 9       | 99                    | 99    | 9.2:1 |
| 2     | 4-NO <sub>2</sub> C <sub>6</sub> H <sub>4</sub> | -- <sup>c</sup> | 24      | 70                    | 86    | 5.0:1 |
| 3     | 4-NO <sub>2</sub> C <sub>6</sub> H <sub>4</sub> | O               | 87      | 92                    | 91    | 5.4:1 |
| 4     | 4-NO <sub>2</sub> C <sub>6</sub> H <sub>4</sub> | S               | 117     | 38                    | 94    | 3.0:1 |
| 5     | 3-NO <sub>2</sub> C <sub>6</sub> H <sub>4</sub> | CH <sub>2</sub> | 34      | 74                    | 97    | 3.2:1 |
| 6     | 2-NO <sub>2</sub> C <sub>6</sub> H <sub>4</sub> | CH <sub>2</sub> | 35      | 98                    | 97    | 7.5:1 |
| 7     | 2-NO <sub>2</sub> C <sub>6</sub> H <sub>4</sub> | -- <sup>c</sup> | 20      | 99                    | 84    | 2.4:1 |
| 8     | 2-NO <sub>2</sub> C <sub>6</sub> H <sub>4</sub> | O               | 140     | 44                    | 87    | 3.2:1 |
| 9     | 4-CF <sub>3</sub> C <sub>6</sub> H <sub>4</sub> | CH <sub>2</sub> | 71      | 99                    | 98    | 2.3:1 |
| 10    | 4-FC <sub>6</sub> H <sub>4</sub>                | CH <sub>2</sub> | 90      | 58                    | 94    | 1.7:1 |
| 11    | C <sub>6</sub> H <sub>5</sub>                   | CH <sub>2</sub> | 100     | 31                    | 86    | 1.0:1 |
| 12    | 2-furanyl                                       | CH <sub>2</sub> | 47      | 39                    | 94    | 1:2.5 |
| 13    | 1-naphthyl                                      | CH <sub>2</sub> | 166     | 55                    | 93    | 4.9:1 |

|                 |                                                  |                 |     |    |    |       |
|-----------------|--------------------------------------------------|-----------------|-----|----|----|-------|
| 14 <sup>b</sup> | 4-ClC <sub>6</sub> H <sub>4</sub>                | CH <sub>2</sub> | 69  | 70 | 91 | 4.1:1 |
| 15 <sup>b</sup> | 4-CH <sub>3</sub> OC <sub>6</sub> H <sub>4</sub> | CH <sub>2</sub> | 100 | 19 | 89 | 3.7:1 |
| 16 <sup>d</sup> | 4-NO <sub>2</sub> C <sub>6</sub> H <sub>4</sub>  |                 | 52  | 25 | 56 | --    |

<sup>a</sup> isolated yields. <sup>b</sup> 0.5 mL H<sub>2</sub>O was added. <sup>c</sup> cyclopentanone used <sup>d</sup> neat acetone used instead of cyclic ketone in the presence of 10% of catalyst and 15% of triflic acid.<sup>e</sup>

## Spectra data for all the Aldol products

### 2-(Hydroxy-(4-nitrophenyl)methyl)cyclohexan-1-one 5a: <sup>[5]</sup>

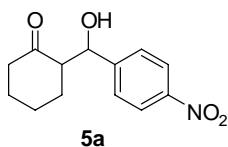

Reaction time: 9 h; The crude product was purified by flash column chromatography (hexane/ ethyl acetate= 5:1) to give pure aldol adduct. yield: 99%; ee: 99%; *Anti/Syn*= 9.2:1, <sup>1</sup>HNMR (300 MHz, CDCl<sub>3</sub>)  $\delta$ (ppm) 8.19-8.23 (m, 2H), 7.48-7.53 (m, 2H), 4.89 (dd, *J* = 8.4, 3.1 Hz, 1H), 4.08 (d, *J* = 3.1 Hz, 1H), 2.46-2.59 (m, 2H), 2.35-2.40 (m, 1H), 2.08-2.14 (m, 1H), 1.81-1.85 (m, 1H), 1.52-1.69 (m, 3H), 1.34-1.43 (m, 1H). HPLC analysis Chiralcel AD-H (Hexane/ i-PrOH = 95/5, 1.0 mL/min,  $\lambda$  = 254 nm, 20°C) *t<sub>R</sub>* (major)= 55.6 min and *t<sub>R</sub>* (minor)= 75.9 min.

### 2-(Hydroxy-(4-nitrophenyl)methyl)cyclopentan-1-one 5b <sup>[3]</sup>

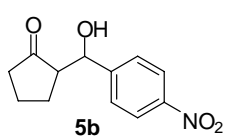

Reaction time: 24 h; The crude product was purified by flash column chromatography (hexane/ ethyl acetate= 4:1) to give pure aldol adduct. yield: 70%; 86%ee; *Anti/Syn*= 5.0:1, <sup>1</sup>HNMR (300 MHz, CDCl<sub>3</sub>)  $\delta$ (ppm) 8.19-8.23 (m, 2H), 7.50-7.55 (m, 2H), 4.84 (d, *J* = 9.2 Hz, 1H), 4.76 (s, 1H), 2.27-2.45 (m, 3H), 1.54-2.02 (m, 4H). HPLC analysis Chiralcel AD-H (Hexane/ i-PrOH = 95/5, 1.0 mL/min,  $\lambda$  = 254 nm, 20°C) *t<sub>R</sub>* (major)= 97.2 min and *t<sub>R</sub>* (minor)= 101.5 min.

### 3-((1-hydroxy-1-(4-nitrophenyl))methyl)-tetrahydropyran-4-one 5c <sup>[3]</sup>

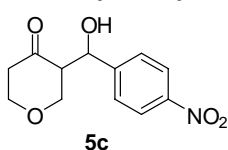

Reaction time: 87 h; The crude product was purified by flash column chromatography (hexane/ ethyl acetate= 3:1) to give pure aldol adduct. yield: 92%; 91%ee; *Anti/Syn*= 5.4:1, <sup>1</sup>HNMR (300 MHz, CDCl<sub>3</sub>)  $\delta$ (ppm) 8.21-8.26 (m, 2H), 7.50-7.53 (m, 2H), 4.99 (d, *J* = 8.0 Hz, 1H), 4.19-4.25 (m, 1H), 3.70-3.85 (m, 3H), 3.42-3.49 (m, 1H), 2.88-2.94 (m, 1H), 2.64-2.70 (m, 1H), 2.50-2.57 (m, 1H). HPLC analysis Chiralcel AD-H (Hexane/ i-PrOH = 95/5, 1.0 mL/min,  $\lambda$  = 254 nm, 20°C) *t<sub>R</sub>* (major)= 22.7 min and *t<sub>R</sub>* (minor)= 26.8 min

### 3-((1-hydroxy-1-(4-nitrophenyl))methyl)-tetrahydrothiopyran-4-one 5d <sup>[3]</sup>

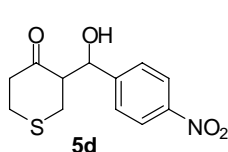

Reaction time: 117 h; The crude product was purified by flash column chromatography (hexane/ ethyl acetate= 4:1) to give pure aldol adduct. yield: 38%; 94%ee; *Anti/Syn*= 3.0:1, <sup>1</sup>HNMR (300 MHz, CDCl<sub>3</sub>)  $\delta$ (ppm) 8.24 (dd, *J* = 8.7, 1.8 Hz, 2H), 7.51-7.56 (dd, *J* = 8.7, 1.8 Hz, 2H), 5.05 (d, *J* = 8.0 Hz, 1H), 3.61 (br, 1H), 2.94-3.09 (m, 3H), 2.75-2.89 (m, 2H), 2.64-2.72 (m, 1H), 2.48-2.55 (m, 1H). HPLC analysis Chiralcel

AD-H (Hexane/ i-PrOH = 95/5, 1.0 mL/min,  $\lambda$  = 254 nm, 20°C)  $t_R$  (major)= 44.3 min and  $t_R$  (minor)= 81.5 min.

### 2-(Hydroxy-(3-nitrophenyl)methyl)cyclohexan-1-one **5e** <sup>[5]</sup>

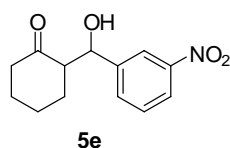

Reaction time: 34 h; The crude product was purified by flash column chromatography (hexane/ ethyl acetate= 5:1) to give pure aldol adduct. yield: 74%; 97%ee; *Anti/Syn*= 3.2:1, <sup>1</sup>HNMR (300 MHz, CDCl<sub>3</sub>)  $\delta$ (ppm) 8.21 (m, 1H), 8.14-8.18 (m, 1H), 7.67(d, *J* = 7.7 Hz, 1H), 7.53 (t, *J* = 7.9 Hz, 1H), 4.89 (dd, *J* = 8.5, 3.0 Hz, 1H), 4.12 (d, *J* = 3.0 Hz, 1H), 2.36-2.62 (m, 3H), 2.10-2.11 (m, 1H), 1.80-1.82 (m, 1H), 1.55-1.63 (m, 3H), 1.23-1.25 (m, 1H), HPLC analysis Chiralcel AD-H (Hexane/ i-PrOH = 95/5, 1.0 mL/min,  $\lambda$  = 254 nm, 20°C)  $t_R$  (minor)= 39.1 min and  $t_R$  (major)= 51.5 min.

### 2-(Hydroxy-(2-nitrophenyl)methyl)cyclohexan-1-one **5f** <sup>[2]</sup>

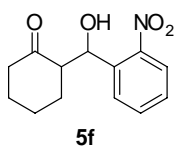

Reaction time: 35 h. The crude product was purified by flash column chromatography (hexane/ ethyl acetate= 7:1) to give pure aldol adduct. yield: 98%; 97%ee; *Anti/Syn*= 7.5:1, <sup>1</sup>HNMR (300 MHz, CDCl<sub>3</sub>)  $\delta$ (ppm) 7.84 (d, *J* = 8.2 Hz, 1H), 7.76 (d, *J* = 7.8 Hz, 1H), 7.63 (t, *J* = 7.4 Hz, 1H), 7.42 (t, *J* = 8.0 Hz, 1H), 5.44 (d, *J* = 7.1 Hz, 1H), 3.80 (br, 1H), 2.71-2.79 (m, 1H), 2.28-2.47 (m, 2H), 2.06-2.12 (m, 1H), 1.82-1.86 (m, 1H), 1.52-1.79 (m, 4H). HPLC analysis Chiralcel AD-H (Hexane/ i-PrOH = 90/10, 1.0 mL/min,  $\lambda$  = 254 nm, 20°C)  $t_R$  (minor)= 45.6 min and  $t_R$  (major)= 50.4 min.

### 2-(Hydroxy-(2-nitrophenyl)methyl)cyclopentan-1-one **5g**

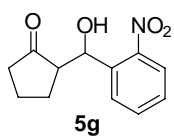

Reaction time: 20 h; The crude product was purified by flash column chromatography (hexane/ ethyl acetate= 7:1) to give pure aldol adduct. yield: 99%; 84%ee; *Anti/Syn*= 2.4:1, <sup>1</sup>HNMR (300 MHz, CDCl<sub>3</sub>)  $\delta$ (ppm) 7.98 (dd, *J* = 8.2, 1.3 Hz, 1H), 7.88 (dd, *J* = 7.9, 1.4 Hz, 1H), 7.62-7.68 (m, 1H), 7.40-7.46 (m, 1H), 5.91 (d, *J* = 3.0 Hz, 1H), 2.70-2.74 (m, 1H), 2.34-2.37 (m, 2H), 2.16-2.19 (m, 1H), 2.01-2.07 (m, 2H), 1.71-1.75 (m, 2H). HPLC analysis Chiralcel AD-H (Hexane/ i-PrOH = 95/5, 1.0 mL/min,  $\lambda$  = 254 nm, 20°C)  $t_R$  (minor)= 35.5 min and  $t_R$  (major)= 38.5 min.

### 3-((1-hydroxy-1-(2-nitrophenyl))methyl)-tetrahydropyran-4-one **5h** <sup>[3]</sup>

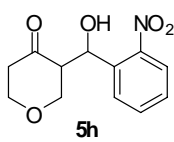

Reaction time: 140 h; The crude product was purified by flash column chromatography (hexane/ ethyl acetate= 3:1) to give pure aldol adduct. yield: 46%; 87%ee; *Anti/Syn*= 3.2:1, <sup>1</sup>HNMR (300 MHz, CDCl<sub>3</sub>)  $\delta$ (ppm) 7.92 (dd, *J* = 8.2, 1.1 Hz, 1H), 7.78-7.83(m, 1H), 7.65-7.70 (m, 1H), 7.44-7.49 (m, 1H), 5.48 (d, *J* = 6.6 Hz, 1H), 4.22-4.28 (m, 1H), 3.89-3.95 (m, 2H), 3.71-3.85 (m, 2H), 3.04-3.08 (m, 1H), 2.65-2.68 (m, 1H), 2.47-2.54 (m, 1H). HPLC analysis Chiralcel AD-H (Hexane/ i-PrOH = 95/5, 1.0 mL/min,  $\lambda$  = 254 nm, 20°C)  $t_R$  (minor)= 35.1 min and  $t_R$  (major)= 37.1 min.

### 2-(Hydroxy-(4-(trifluoromethyl)phenyl)methyl)cyclohexan-1-one **5i** <sup>[2]</sup>

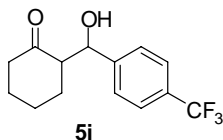

Reaction time: 71 h; The crude product was purified by flash column

chromatography (hexane/ ethyl acetate= 15:1) to give pure aldol adduct. yield: 99%; 98%*ee*; *Anti/Syn*= 2.3:1, <sup>1</sup>HNMR (300 MHz, CDCl<sub>3</sub>) δ(ppm) 7.61 (d, *J* = 8.1 Hz, 2H), 7.44 (d, *J* = 8.1 Hz, 2H), 4.84 (d, *J* = 8.6 Hz, 1H), 4.05 (s, 1H), 2.57-2.64 (m, 1H), 2.46-2.51 (m, 1H), 2.35-2.39 (m, 1H), 2.07-2.14 (m, 1H), 1.79-1.83 (m, 1H), 1.48-1.73 (m, 3H), 1.25-1.39 (m, 1H). HPLC analysis Chiralcel AD-H (Hexane/ i-PrOH = 90/10, 0.5 mL/min, λ = 220 nm, 20°C) *t<sub>R</sub>* (major)= 22.6 min and *t<sub>R</sub>* (minor)= 28.3 min.

### 2-(Hydroxy-(4-fluorophenyl)methyl)cyclohexan-1-one **5j** <sup>[2]</sup>

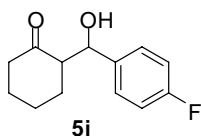

Reaction time: 90 h; The crude product was purified by flash column chromatography (hexane/ ethyl acetate= 15:1) to give pure aldol adduct. yield: 58%; 94%*ee*; *Anti/Syn*= 1.7:1, <sup>1</sup>HNMR (300 MHz, CDCl<sub>3</sub>) δ(ppm) 7.26-7.32 (m, 2H), 7.00-7.07 (m, 2H), 4.77 (d, *J* = 8.8 Hz, 1H), 3.99 (br, 1H), 2.45-2.56 (m, 2H), 2.34-2.48 (m, 1H), 2.06-2.11 (m, 1H), 1.77-1.82 (m, 1H), 1.51-1.68 (m, 3H), 1.25-1.30 (m, 1H). HPLC analysis Chiralcel AD-H (Hexane/ i-PrOH = 95/5, 1.0 mL/min, λ = 220 nm, 20°C) *t<sub>R</sub>* (major)= 27.9 min and *t<sub>R</sub>* (minor)= 30.6 min.

### 2-(Hydroxy(phenyl)methyl)cyclohexan-1-one **5k** <sup>[2]</sup>

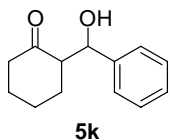

Reaction time: 100 h; The crude product was purified by flash column chromatography (hexane/ ethyl acetate= 10:1) to give pure aldol adduct. yield: 31%; 86%*ee*; *Anti/Syn*= 1.0:1, <sup>1</sup>HNMR (300 MHz, CDCl<sub>3</sub>) δ(ppm) 7.22-7.37 (m, 5H), 4.79 (d, *J* = 8.8 Hz, 1H), 3.97 (br, 1H), 2.57-2.64 (m, 1H), 2.05-2.12 (m, 1H), 1.51-1.70 (m, 4H), 1.25-1.32 (m, 1H). HPLC analysis Chiralcel OD-H (Hexane/ i-PrOH = 90/10, 0.5 mL/min, λ = 220 nm, 20°C) *t<sub>R</sub>* (minor)= 16.8 min and *t<sub>R</sub>* (major)= 23.9 min.

### 2-(Hydroxy-(furan-2-yl)propyl)cyclohexan-1-one **5l** <sup>[2]</sup>

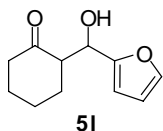

Reaction time: 47 h; The crude product was purified by flash column chromatography (hexane/ ethyl acetate= 5:1) to give pure aldol adduct. yield: 39%; 94%*ee*; *Anti/Syn*= 1:2.5, <sup>1</sup>HNMR (300 MHz, CDCl<sub>3</sub>) δ(ppm) 7.34 (s, 1H), 6.34 (s, 1H), 6.23 (s, 1H), 5.28 (s, 1H), 3.03 (s, 1H), 2.80-2.84 (m, 1H), 2.31-2.48 (m, 2H), 2.08-2.09 (m, 1H), 1.67-1.98 (m, 5H). HPLC analysis Chiralcel AD-H (Hexane/ i-PrOH = 95/5, 0.5 mL/min, λ = 220 nm, 20°C) *t<sub>R</sub>* (major)= 33.1 min and *t<sub>R</sub>* (minor)= 36.3 min.

### 2-(Hydroxy(naphthalen-1-yl)methyl)cyclohexan-1-one **5m** <sup>[2]</sup>

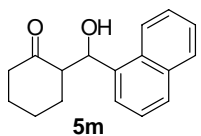

Reaction time: 166 h; The crude product was purified by flash column chromatography (hexane/ ethyl acetate= 15:1) to give pure aldol adduct. yield: 55%; 93%*ee*; *Anti/Syn*= 4.9:1, <sup>1</sup>HNMR (300 MHz, CDCl<sub>3</sub>) δ(ppm) 8.24-8.27 (m, 1H), 7.84-7.89 (m, 1H), 7.81 (d, *J* = 8.1 Hz, 1H), 7.57 (d, *J* = 6.3 Hz, 1H), 7.45-7.53 (m, 3H), 5.58 (dd, *J* = 8.7, 2.9 Hz, 1H), 4.15 (d, *J* = 2.9 Hz, 1H), 2.95-3.04 (m, 1H), 2.49-2.54 (m, 1H), 2.35-2.45 (m, 1H), 2.05-2.12 (m, 1H), 1.61-1.74 (m, 2H), 1.33-1.51 (m, 3H). HPLC analysis Chiralcel AD-H (Hexane/ i-PrOH = 95/5, 1.0 mL/min, λ = 254 nm, 20°C) *t<sub>R</sub>*(major)= 25.6 min

and  $t_R$  (minor) = 31.2 min.

### 2-(Hydroxy-(4-chlorophenyl)methyl)cyclohexan-1-one **5n** <sup>[2]</sup>

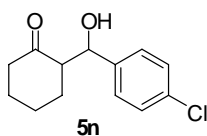

Reaction time: 69 h; The crude product was purified by flash column chromatography (hexane/ ethyl acetate= 10:1) to give pure aldol adduct. yield: 70%; 91%ee; *Anti/Syn*= 4.1:1, <sup>1</sup>HNMR (300 MHz, CDCl<sub>3</sub>)  $\delta$ (ppm) 7.31-7.33 (m, 2H), 7.24-7.27 (m, 2H), 4.76 (dd, *J* = 8.7, 2.8 Hz, 1H), 3.98 (d, *J* = 2.8 Hz, 1H), 2.45-2.58 (m, 2H), 2.30-2.40 (m, 1H), 2.06-2.13 (m, 1H), 1.77-1.83 (m, 1H), 1.51-1.69 (m, 3H), 1.26-1.36 (m, 1H). HPLC analysis Chiralcel AD-H (Hexane/ *i*-PrOH = 90/10, 0.5 mL/min,  $\lambda$  = 220 nm, 20°C)  $t_R$  (major)= 25.9 min and  $t_R$  (minor)= 30.0 min.

### 2-(Hydroxy-(4-methoxyphenyl)methyl)cyclohexan-1-one **5o** <sup>[2]</sup>

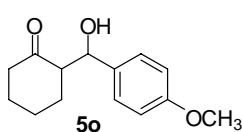

Reaction time: 100 h; The crude product was purified by flash column chromatography (hexane/ ethyl acetate= 10:1) to give pure aldol adduct. yield: 19%; 89%ee; *Anti/Syn*= 3.7:1, <sup>1</sup>HNMR (300 MHz, CDCl<sub>3</sub>)  $\delta$ (ppm) 7.21-7.26 (m, 2H), 6.85-6.91 (m, 2H), 4.74 (dd, *J* = 8.7, 2.0 Hz, 1H), 3.91 (d, *J* = 2.0 Hz, 1H), 3.80 (s, 3H), 2.57-2.60 (m, 1H), 2.44-2.50 (m, 1H), 2.34-2.41 (m, 1H), 2.05-2.11 (m, 1H), 1.76-1.81 (m, 1H), 1.52-1.69 (m, 3H), 1.23-1.33 (m, 1H). HPLC analysis Chiralcel AD-H (Hexane/ *i*-PrOH = 95/5, 0.5 mL/min,  $\lambda$  = 220 nm, 20°C)  $t_R$  (major)= 78.1 min and  $t_R$  (minor)= 81.8 min.

### 2-(Hydroxy-(4-nitrophenyl)methyl)butan-2-one **5p** <sup>[4]</sup>

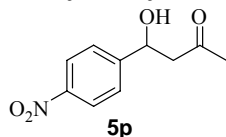

Reaction time: 52 h; The crude product was purified by flash column chromatography (hexane/ ethyl acetate= 3:1) to give pure aldol adduct. yield: 25%; 56%ee; <sup>1</sup>HNMR (300 MHz, CDCl<sub>3</sub>)  $\delta$ (ppm) 8.21 (d, *J* = 8.7 Hz, 2H), 7.54 (d, *J* = 8.7 Hz, 2H), 5.26 (dd, *J* = 7.3, 4.9 Hz, 1H), 3.61 (br, 1H), 2.84-2.86 (m, 2H), 2.22 (s, 3H). HPLC analysis Chiralcel AS-H (Hexane/ *i*-PrOH = 70/30, 1.0 mL/min,  $\lambda$  = 254 nm, 20°C)  $t_R$  (minor)= 22.2 min and  $t_R$  (major)= 27.4 min.

<sup>2</sup> Wu, Y.-Y.; Zhang, Y.-Z.; Yu, M.-L.; Zhao, G.; Wang, S.-W. *Org. Lett.* **2006**, *8*, 4417-4420.

<sup>3</sup> Chen, J.-R.; Li, X.-Y.; Xing, X.-N.; Xiao, W.-J. *J. Org. Chem.* **2006**, *71*, 8198-8202

<sup>4</sup> Tang, Z.; Yang, Z.-H.; Chen, X.-H.; Cun, L.-F.; Mi, A.-Q.; Jiang, Y.-Z.; Gong, L.-Z. *J. Am. Chem. Soc.*; **2005**; *127*; 9285-9289

<sup>5</sup> Chen, J.-R.; Lu, H.-H.; Li, X.-Y.; Cheng, L.; Wan, J.; Xiao, W.-J. *Org. Lett.* **2005**, *7*, 4543-4545.

## NMR spectra for all the Aldol products

### <sup>1</sup>H NMR spectra of **5a**

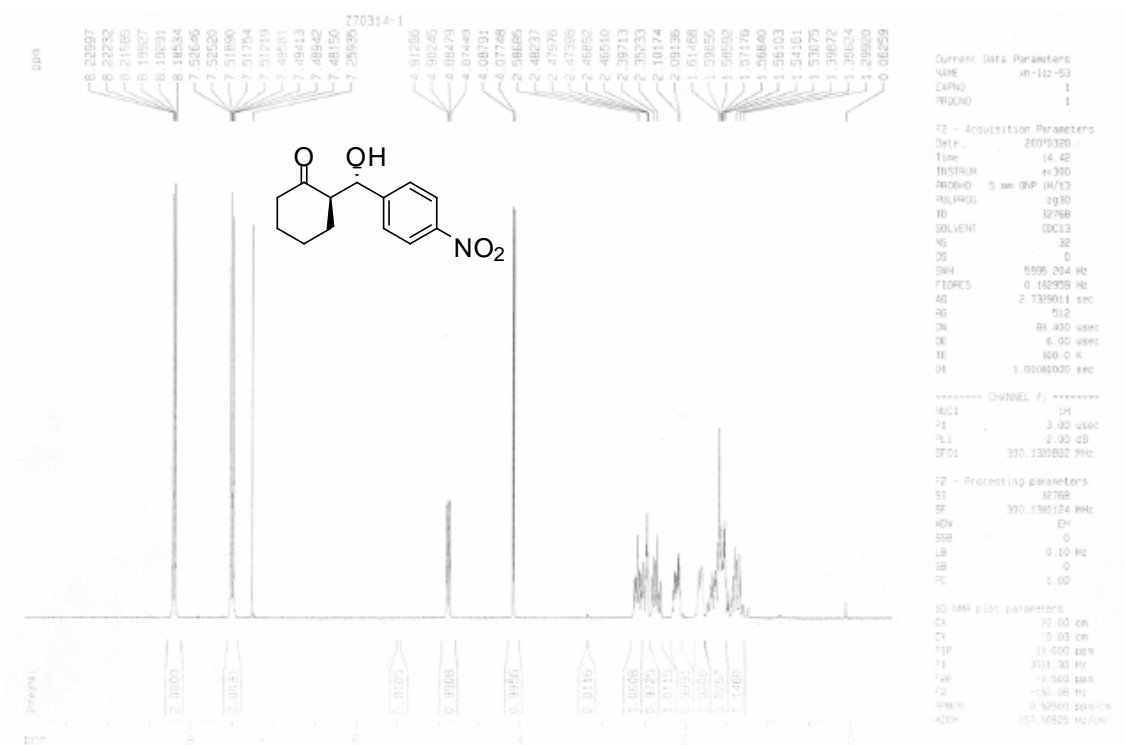

### <sup>1</sup>H NMR spectra of **5b**

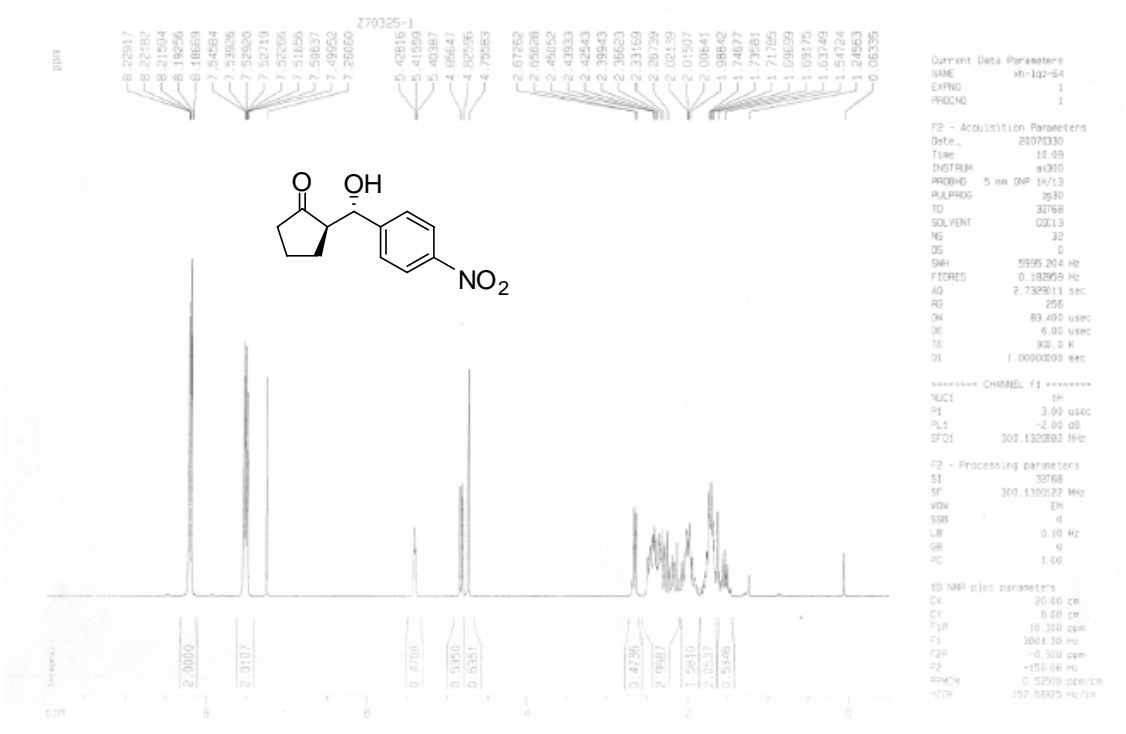





<sup>1</sup>H NMR spectra of **5e**

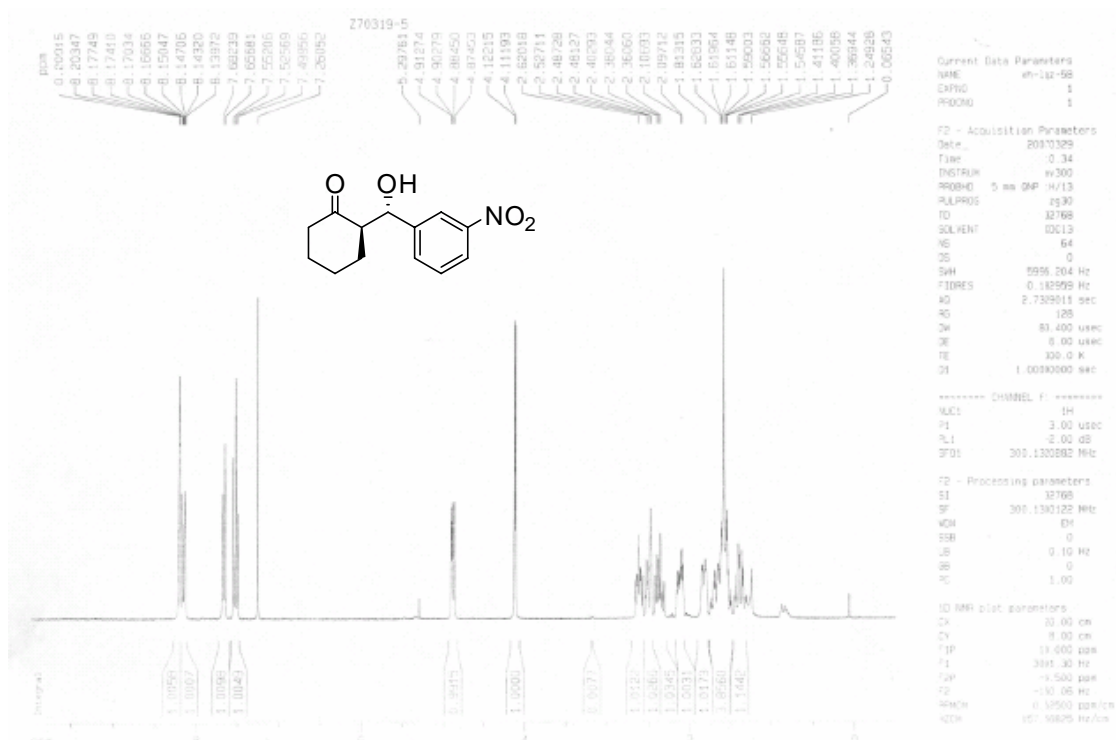

<sup>1</sup>H NMR spectra of **5f**

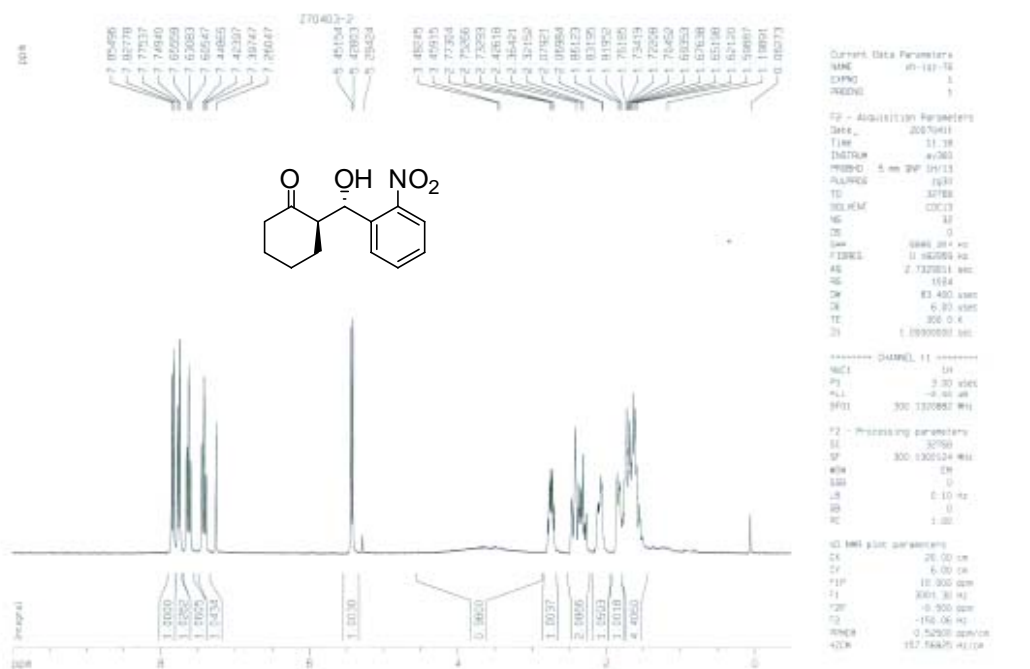

<sup>1</sup>H NMR spectra of **5g**

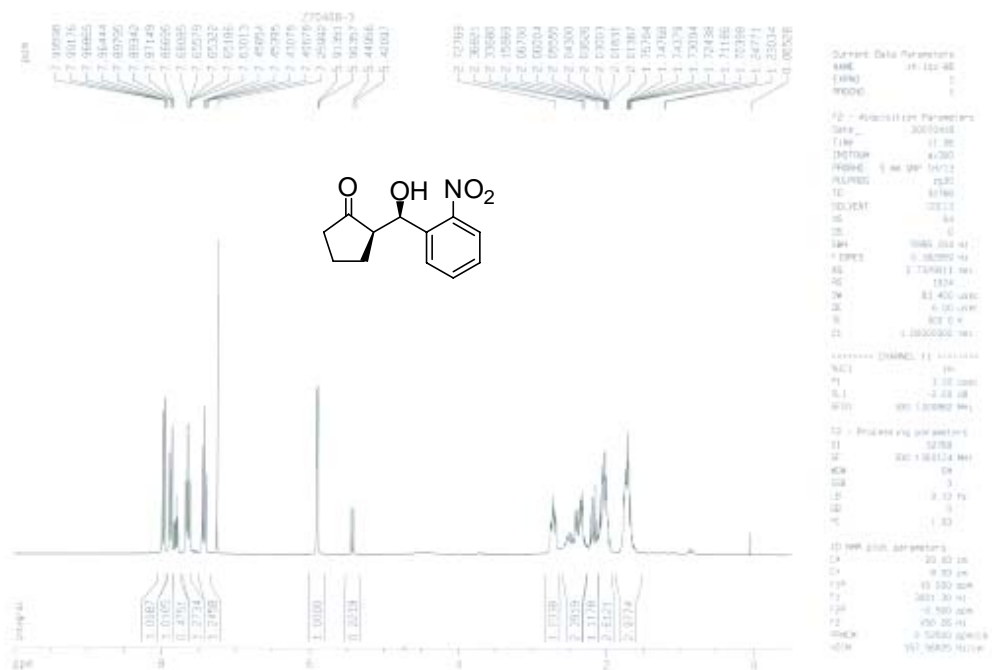

<sup>1</sup>H NMR spectra of **5h**

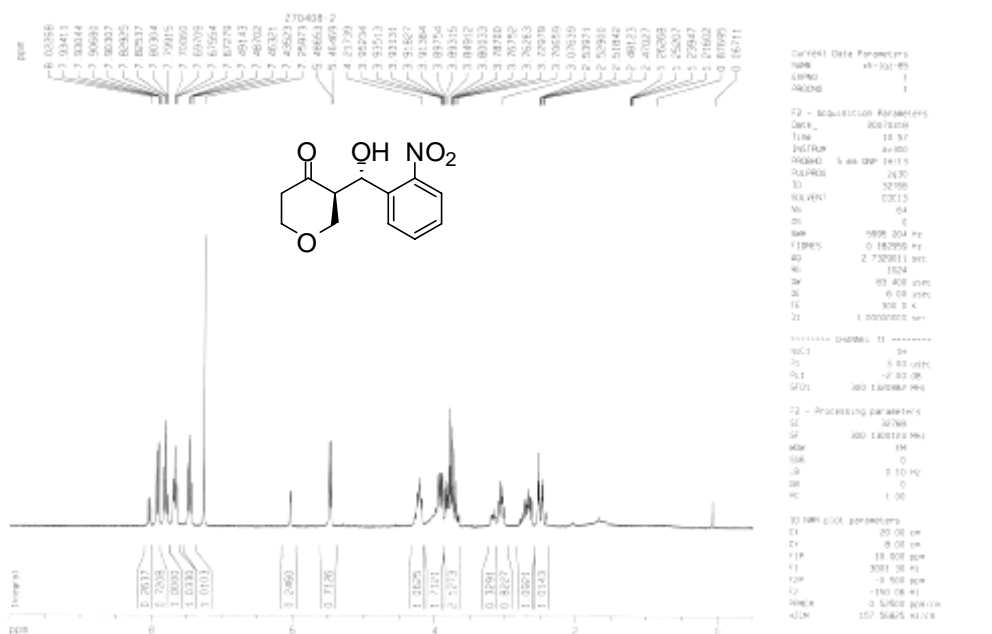

<sup>1</sup>H NMR spectra of **5i**

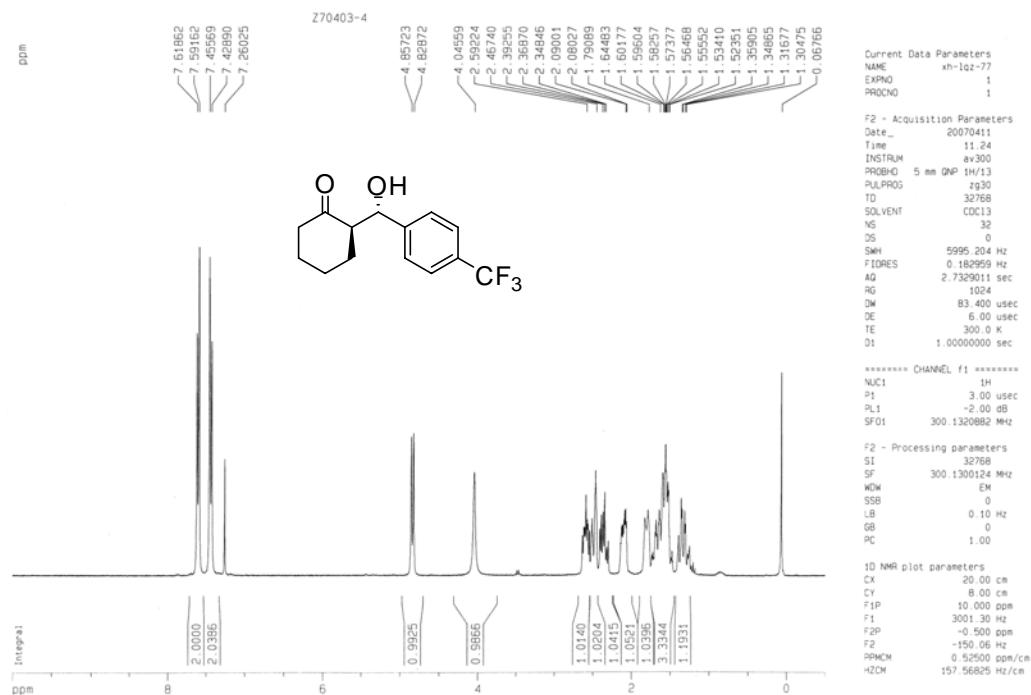

<sup>1</sup>H NMR spectra of **5j**

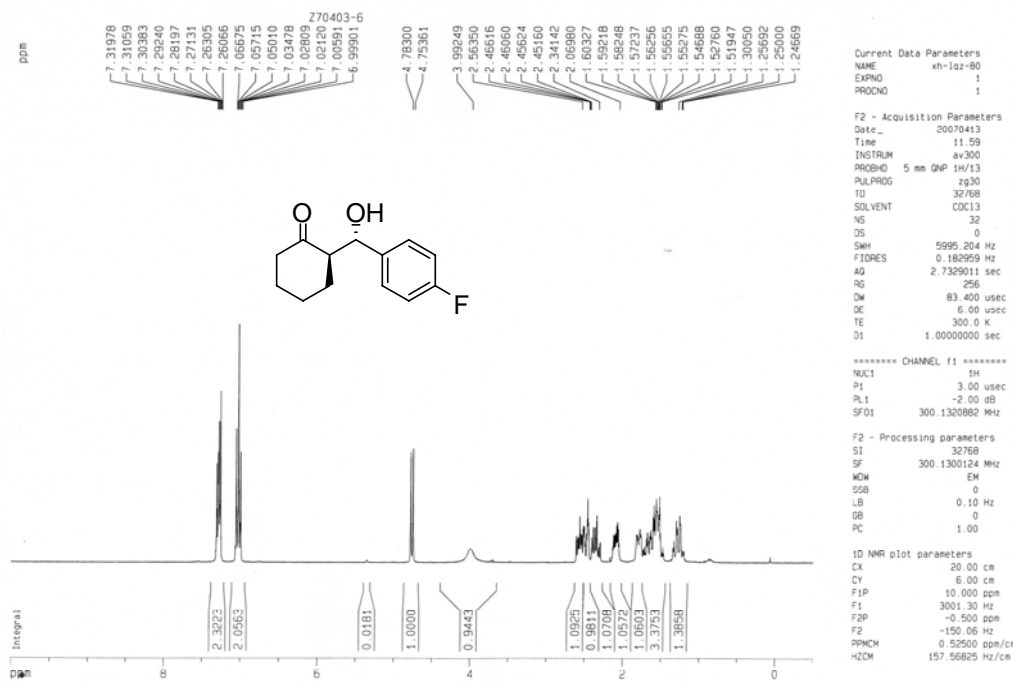

<sup>1</sup>H NMR spectra of **5k**

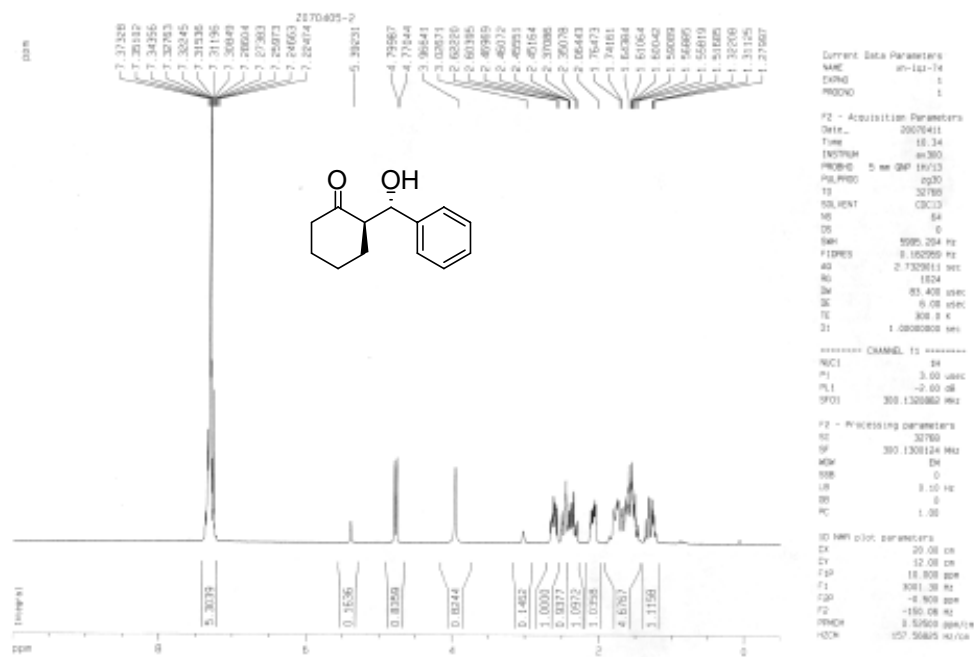

<sup>1</sup>H NMR spectra of **5l**

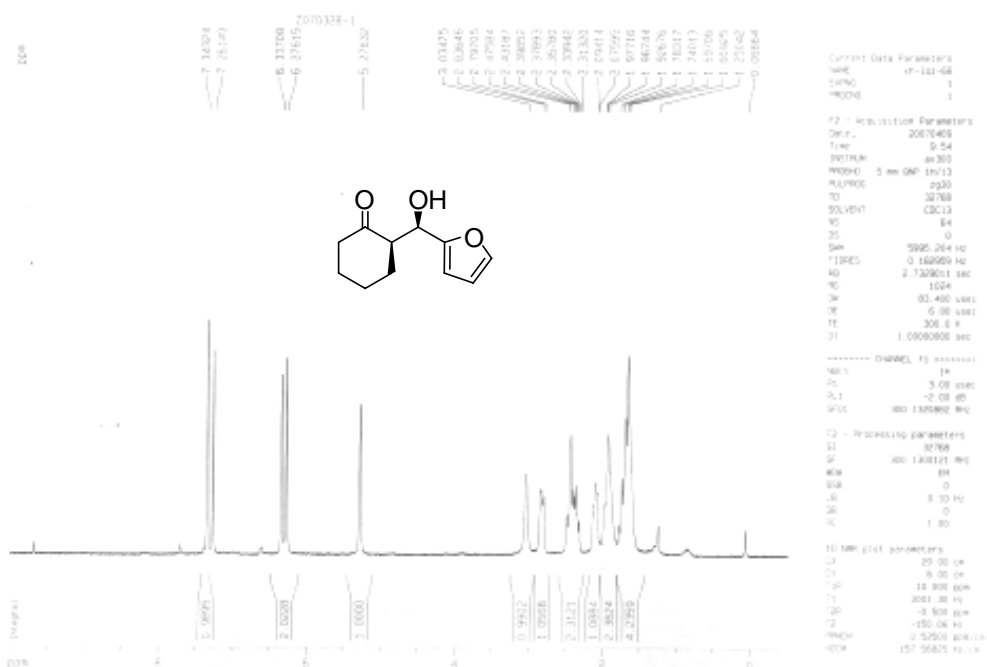

<sup>1</sup>H NMR spectra of **5m**

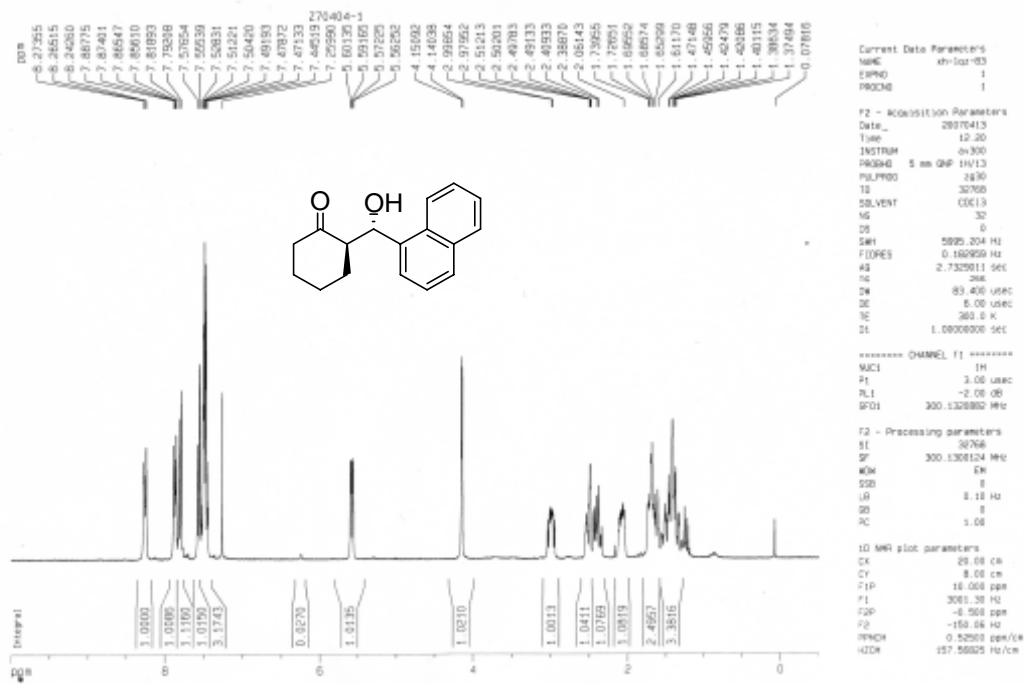

<sup>1</sup>H NMR spectra of **5n**

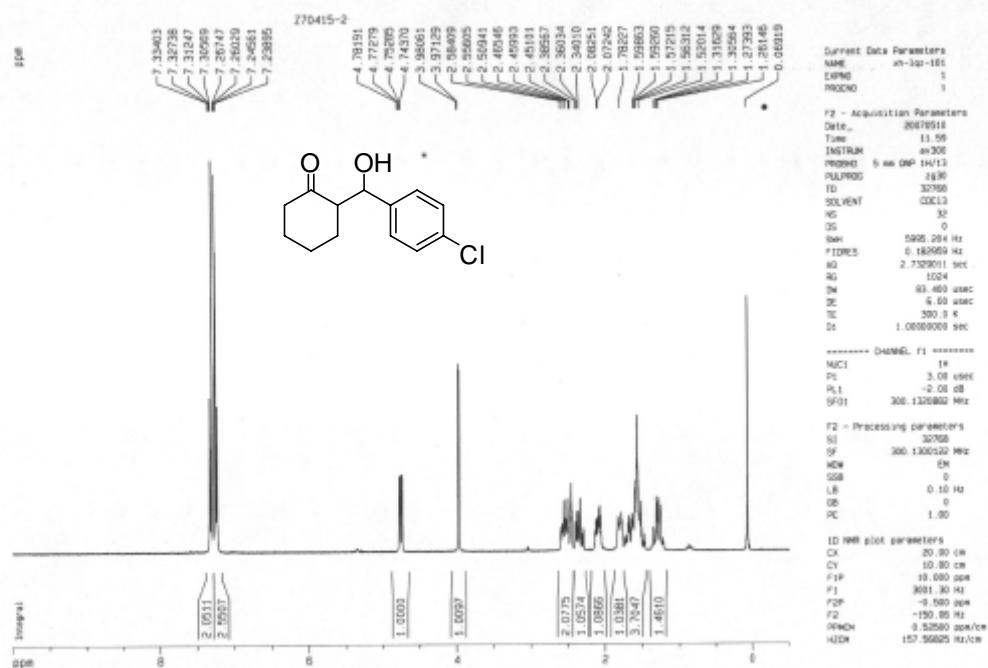

<sup>1</sup>H NMR spectra of **5o**

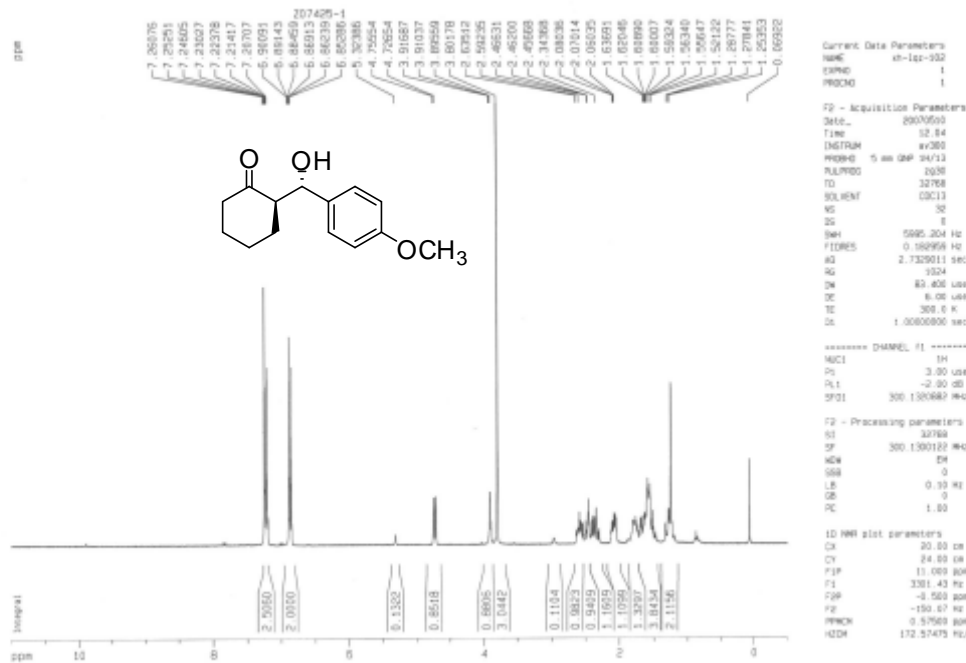

<sup>1</sup>H NMR spectra of **5p**

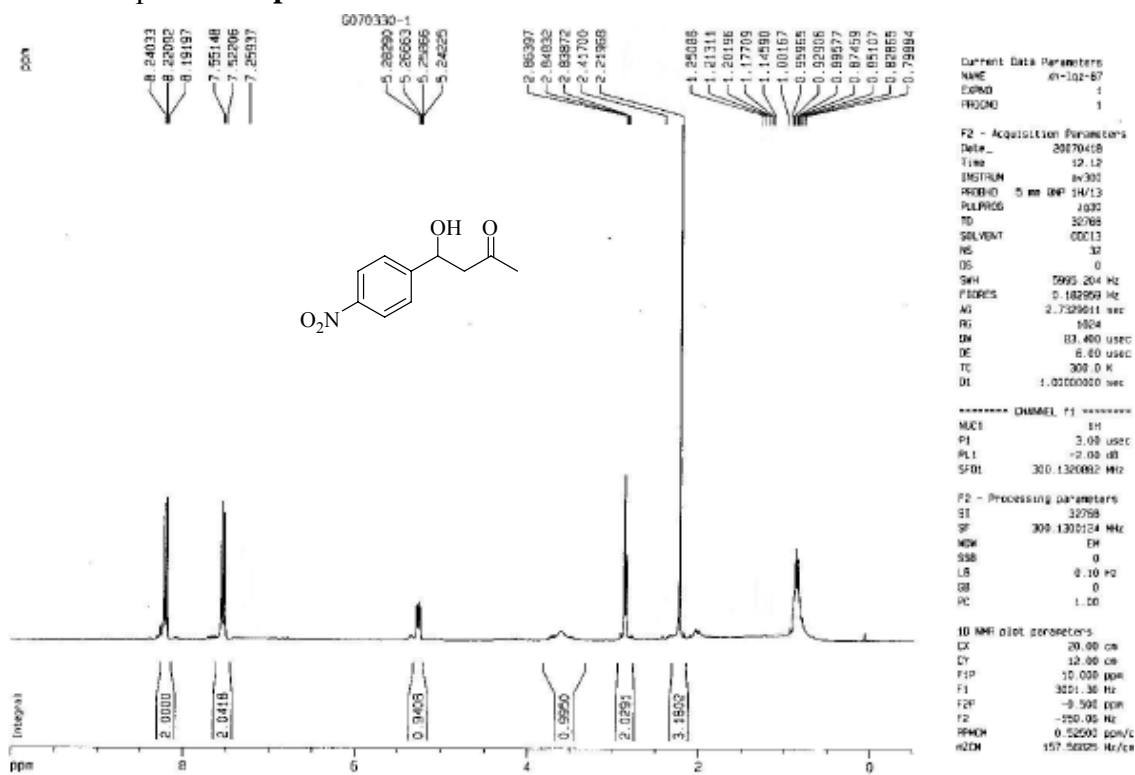

## HPLC spectra for compounds 5a-p

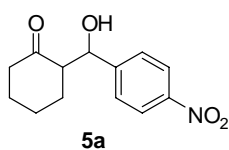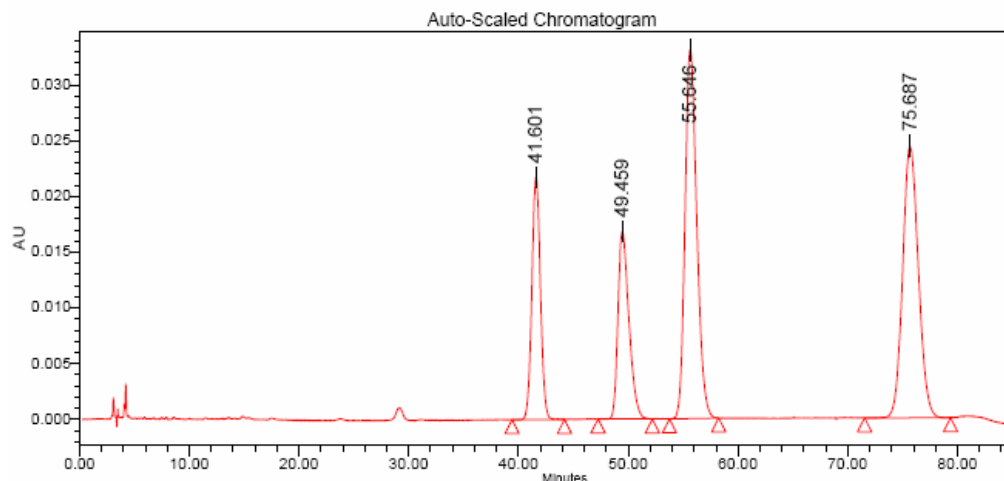

Peak Results

|   | Name | Retention Time | Area    | Total   | Area Percent |
|---|------|----------------|---------|---------|--------------|
| 1 |      | 41.601         | 1175951 | 7239378 | 16.24        |
| 2 |      | 49.459         | 1171700 | 7239378 | 16.19        |
| 3 |      | 55.646         | 2461099 | 7239378 | 34.00        |
| 4 |      | 75.687         | 2430627 | 7239378 | 33.58        |

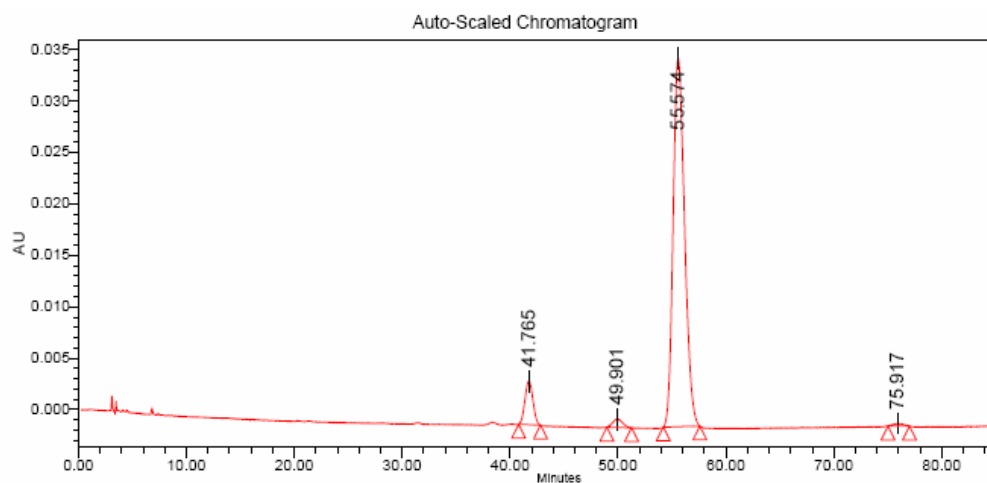

Peak Results

|   | Name | Retention Time | Area    | Area Percent | Totals  |
|---|------|----------------|---------|--------------|---------|
| 1 |      | 41.765         | 217327  | 7.44         | 2922071 |
| 2 |      | 49.901         | 51583   | 1.77         | 2922071 |
| 3 |      | 55.574         | 2634486 | 90.16        | 2922071 |
| 4 |      | 75.917         | 18674   | 0.64         | 2922071 |



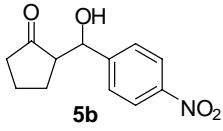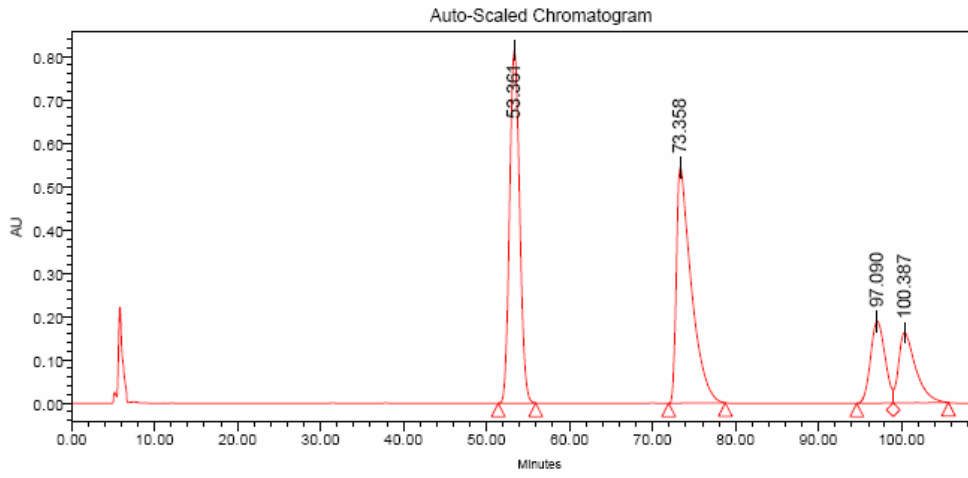

Peak Results

| Name | Retention Time | Area     | Totals   | Area Percent |
|------|----------------|----------|----------|--------------|
| 1    | 53.361         | 68676779 | 18286048 | 37.56        |
| 2    | 73.358         | 68065101 | 18286048 | 37.22        |
| 3    | 97.090         | 22860786 | 18286048 | 12.50        |
| 4    | 100.387        | 23273379 | 18286048 | 12.73        |

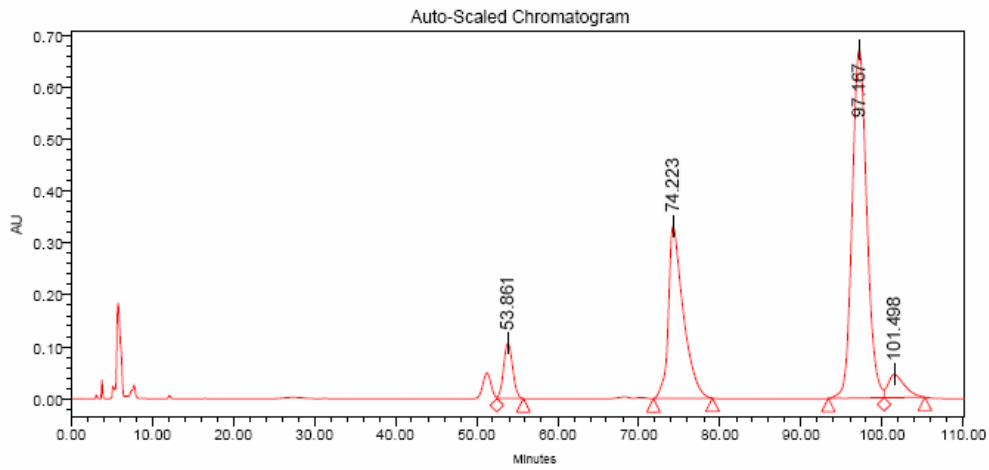

Peak Results

| Name | Retention Time | Area     | Totals    | Area Percent |
|------|----------------|----------|-----------|--------------|
| 1    | 53.861         | 8303914  | 141464451 | 5.87         |
| 2    | 74.223         | 42481783 | 141464451 | 30.03        |
| 3    | 97.167         | 84428561 | 141464451 | 59.68        |
| 4    | 101.498        | 6252192  | 141464451 | 4.42         |

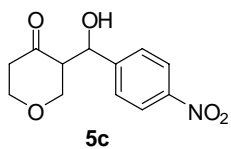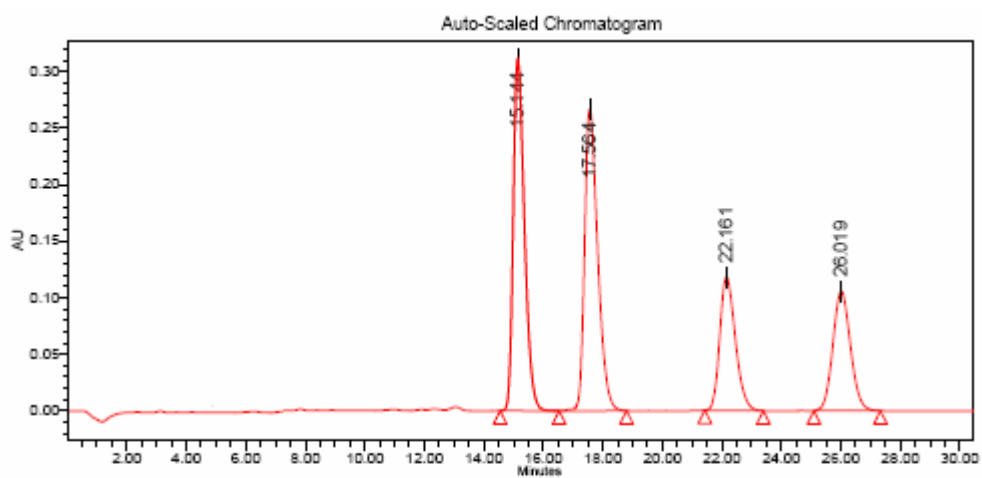

Peak Results

| Name | Retention Time | Area    | Totals   | Area Percent |
|------|----------------|---------|----------|--------------|
| 1    | 15.144         | 8118935 | 24932715 | 32.56        |
| 2    | 17.564         | 8170841 | 24932715 | 32.77        |
| 3    | 22.161         | 4315222 | 24932715 | 17.31        |
| 4    | 26.019         | 4327717 | 24932715 | 17.35        |

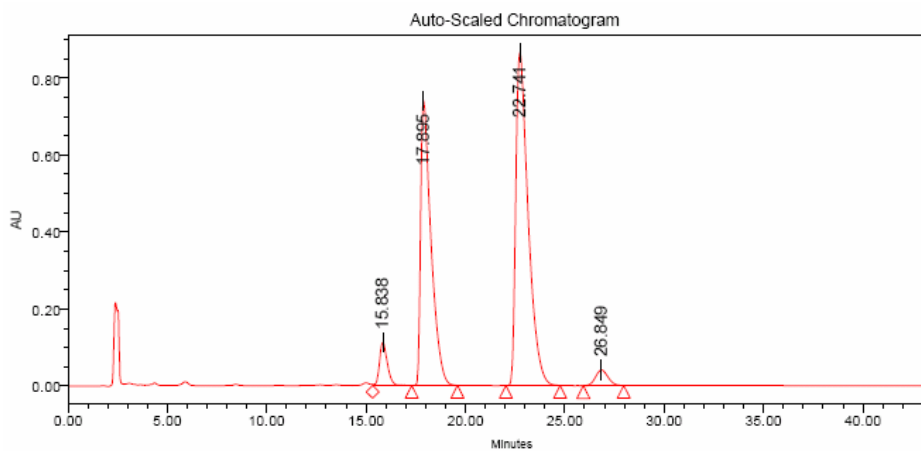

Peak Results

| Name | Retention Time | Area     | Totals   | Area Percent |
|------|----------------|----------|----------|--------------|
| 1    | 15.838         | 3044920  | 89115858 | 4.41         |
| 2    | 17.895         | 26882502 | 89115858 | 38.99        |
| 3    | 22.741         | 37444575 | 89115858 | 54.18        |
| 4    | 26.849         | 1743861  | 89115858 | 2.52         |

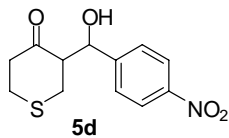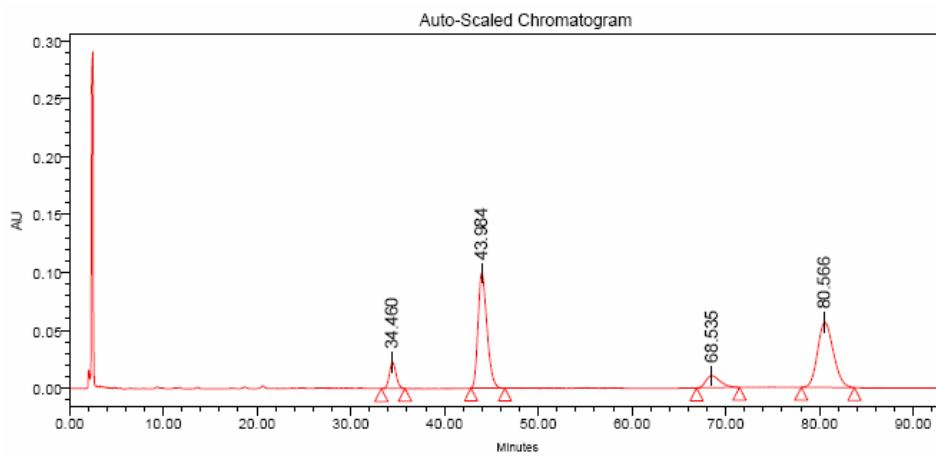

Peak Results

| Name | Retention Time | Area    | Totals   | Area Percent |
|------|----------------|---------|----------|--------------|
| 1    | 34.480         | 1116382 | 15378217 | 7.28         |
| 2    | 43.984         | 6584691 | 15378217 | 42.82        |
| 3    | 68.535         | 1085772 | 15378217 | 7.08         |
| 4    | 80.588         | 6591373 | 15378217 | 42.86        |

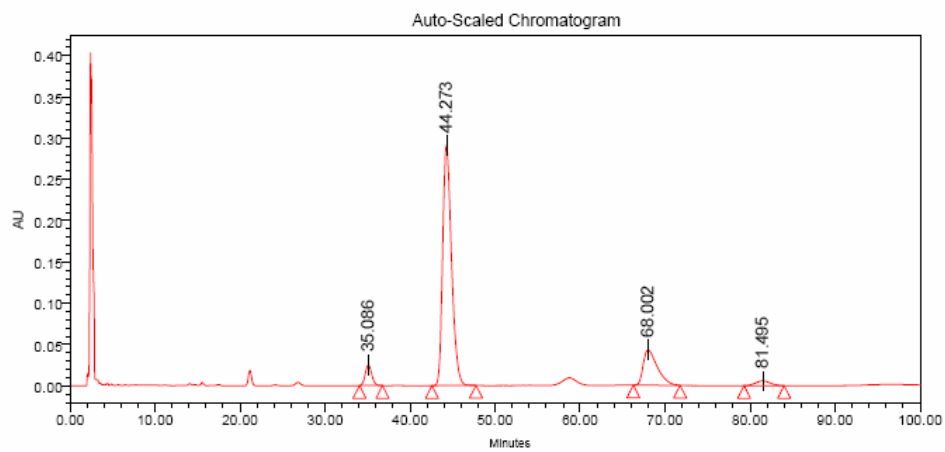

Peak Results

| Name | Retention Time | Area     | Totals   | Area Percent |
|------|----------------|----------|----------|--------------|
| 1    | 35.086         | 1336464  | 27863315 | 4.80         |
| 2    | 44.273         | 20972541 | 27863315 | 75.27        |
| 3    | 68.002         | 4880365  | 27863315 | 17.52        |
| 4    | 81.495         | 873956   | 27863315 | 2.42         |

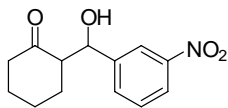

5e

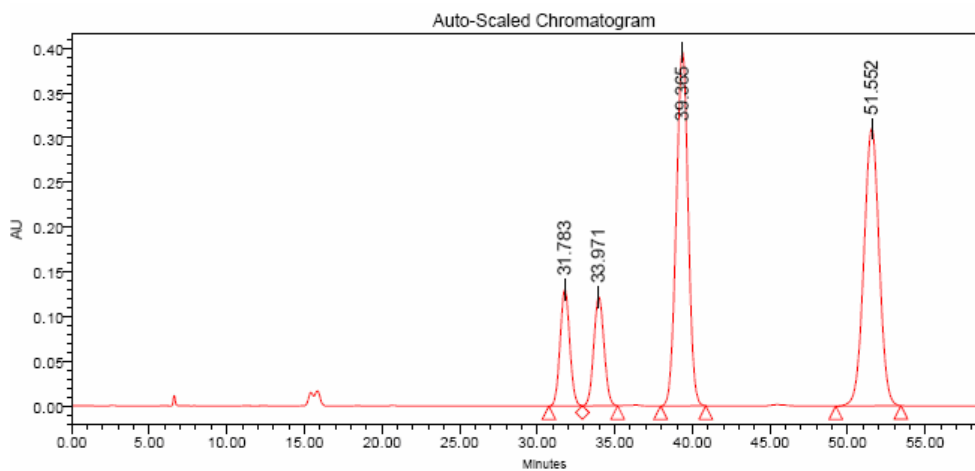

Peak Results

| Name | Retention Time | Area     | Totals   | Area Percent |
|------|----------------|----------|----------|--------------|
| 1    | 31.783         | 5632934  | 53577892 | 10.51        |
| 2    | 33.971         | 5638854  | 53577892 | 10.52        |
| 3    | 39.365         | 21023818 | 53577892 | 39.24        |
| 4    | 51.552         | 21284286 | 53577892 | 39.73        |

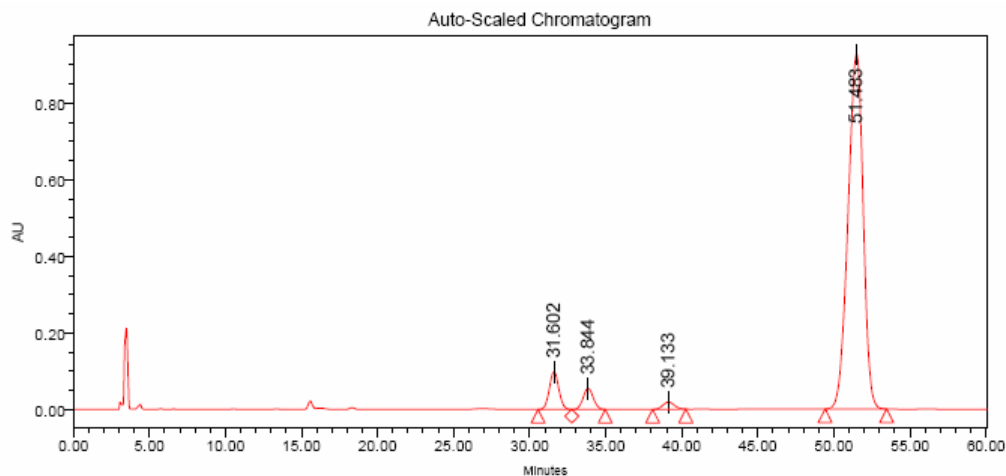

Peak Results

| Name | Retention Time | Area     | Totals   | Area Percent |
|------|----------------|----------|----------|--------------|
| 1    | 31.602         | 4214708  | 72202576 | 5.84         |
| 2    | 33.844         | 2532438  | 72202576 | 3.51         |
| 3    | 39.133         | 964180   | 72202576 | 1.34         |
| 4    | 51.483         | 64491250 | 72202576 | 89.32        |

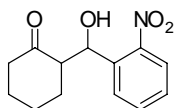

5f

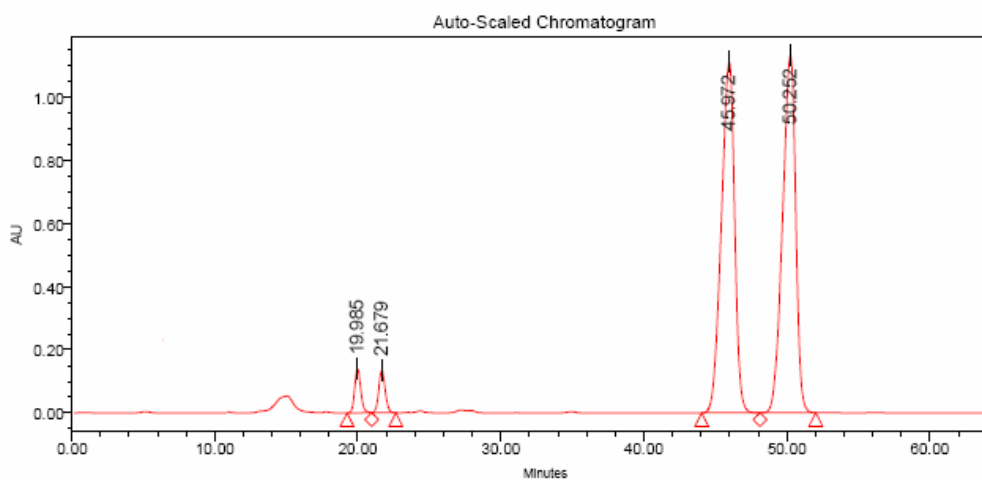

Peak Results

| Name | Retention Time | Area     | Totals    | Area Percent |
|------|----------------|----------|-----------|--------------|
| 1    | 19.985         | 4174324  | 151830456 | 2.75         |
| 2    | 21.679         | 4208380  | 151830456 | 2.77         |
| 3    | 45.972         | 71550841 | 151830456 | 47.13        |
| 4    | 50.252         | 71898911 | 151830456 | 47.35        |

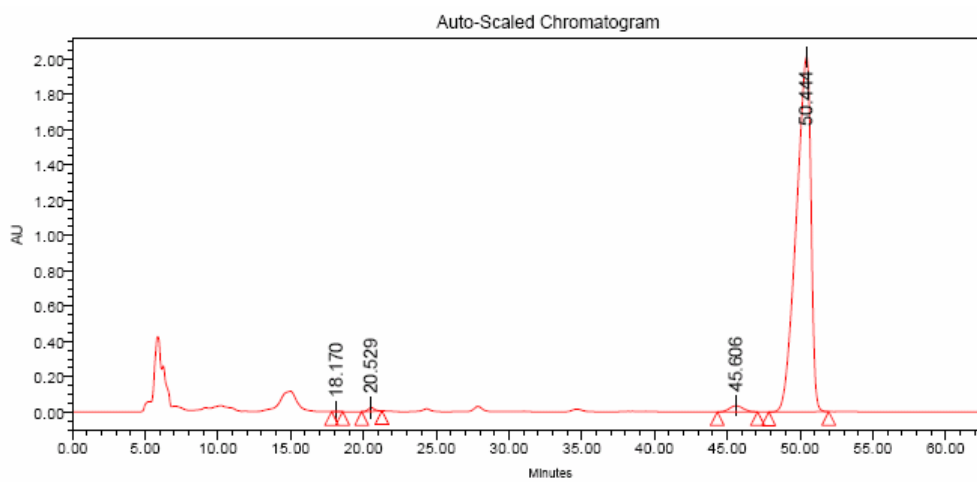

Peak Results

| Name | Retention Time | Area      | Totals    | Area Percent |
|------|----------------|-----------|-----------|--------------|
| 1    | 18.170         | 35037     | 143944123 | 0.02         |
| 2    | 20.529         | 634556    | 143944123 | 0.44         |
| 3    | 45.606         | 2238084   | 143944123 | 1.55         |
| 4    | 50.444         | 141036446 | 143944123 | 97.98        |

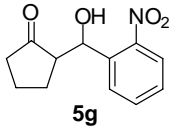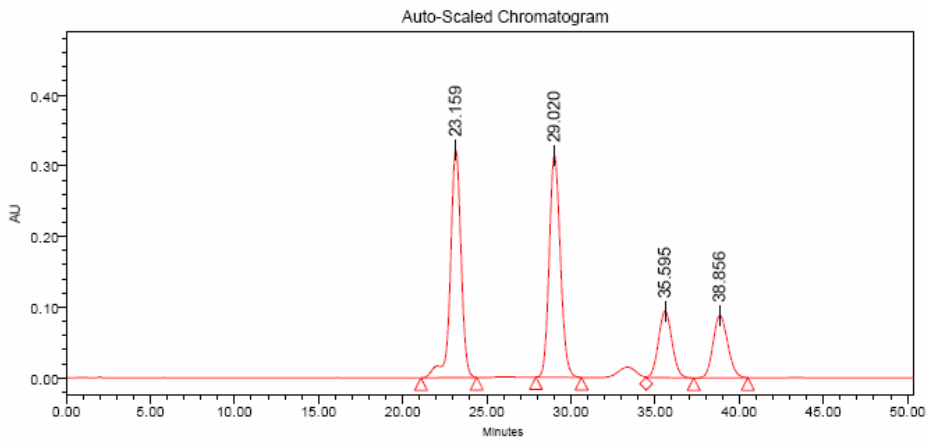

Peak Results

| Name | Retention Time | Area     | Totals   | Area Percent |
|------|----------------|----------|----------|--------------|
| 1    | 23.159         | 14279817 | 39254553 | 36.38        |
| 2    | 29.020         | 14407887 | 39254553 | 36.70        |
| 3    | 35.595         | 5258088  | 39254553 | 13.39        |
| 4    | 38.856         | 5310982  | 39254553 | 13.53        |

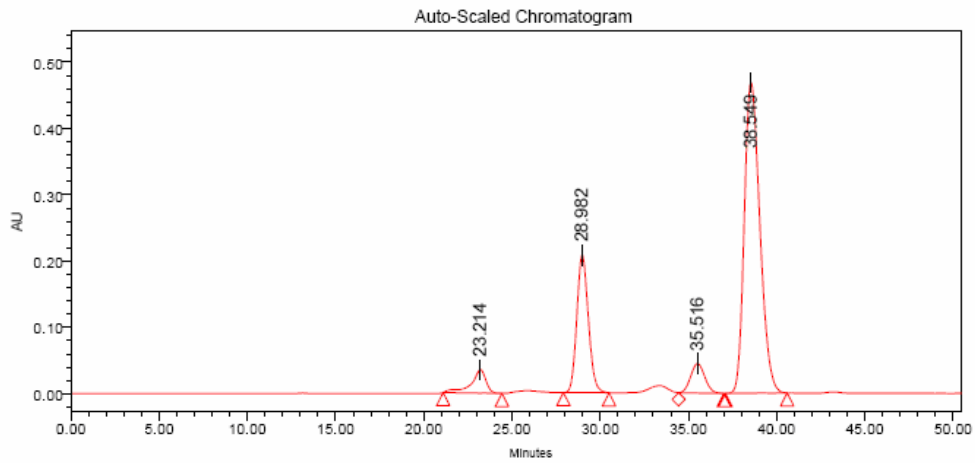

Peak Results

| Name | Retention Time | Area     | Totals   | Area Percent |
|------|----------------|----------|----------|--------------|
| 1    | 23.214         | 2051324  | 42742869 | 4.80         |
| 2    | 28.982         | 9492631  | 42742869 | 22.21        |
| 3    | 35.516         | 2455310  | 42742869 | 5.74         |
| 4    | 38.549         | 28743804 | 42742869 | 67.25        |

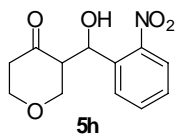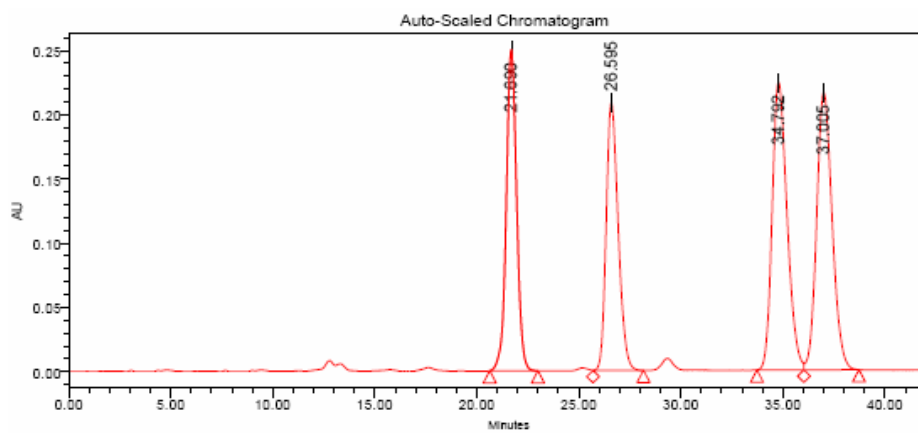

Peak Results

| Name | Retention Time | Area     | Totals   | Area Percent |
|------|----------------|----------|----------|--------------|
| 1    | 21.690         | 8806320  | 40046701 | 21.99        |
| 2    | 26.595         | 8491156  | 40046701 | 21.20        |
| 3    | 34.792         | 11350246 | 40046701 | 28.34        |
| 4    | 37.005         | 11398979 | 40046701 | 28.46        |

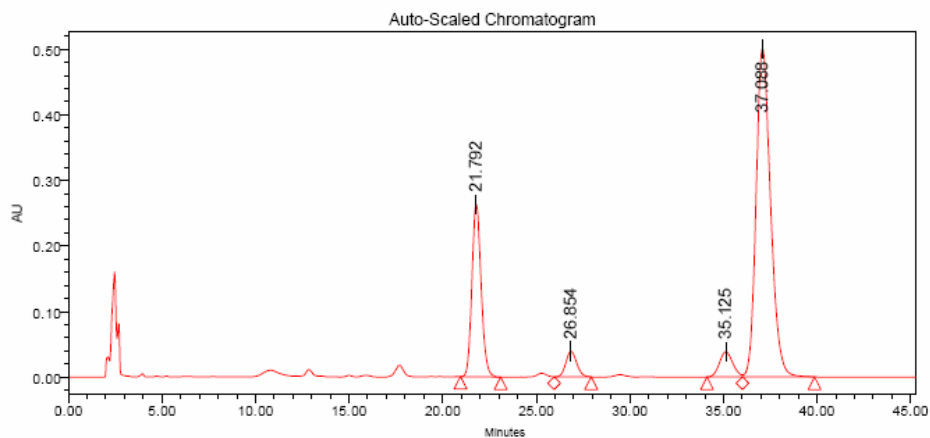

Peak Results

| Name | Retention Time | Area     | Totals   | Area Percent |
|------|----------------|----------|----------|--------------|
| 1    | 21.792         | 8997134  | 39348790 | 22.87        |
| 2    | 26.854         | 1575373  | 39348790 | 4.00         |
| 3    | 35.125         | 1891348  | 39348790 | 4.81         |
| 4    | 37.068         | 26884924 | 39348790 | 68.32        |

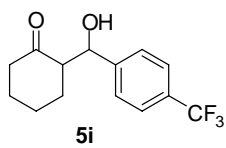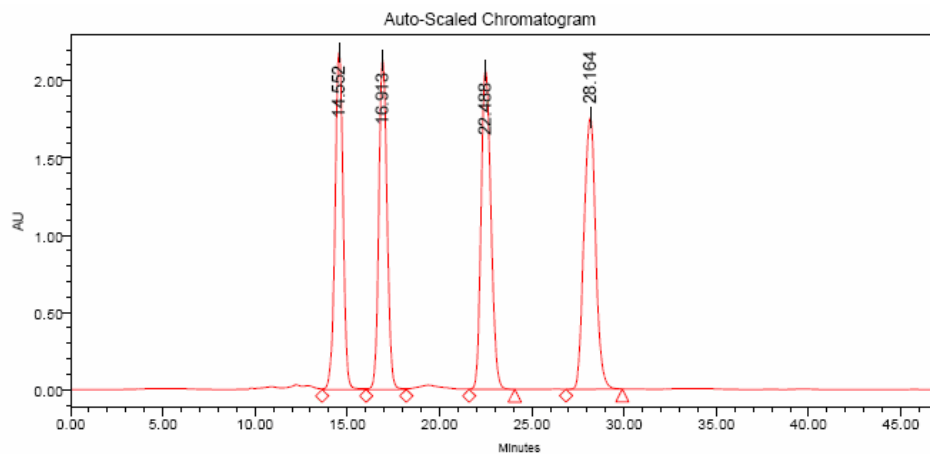

Peak Results

| Name | Retention Time | Area     | Totals    | Area Percent |
|------|----------------|----------|-----------|--------------|
| 1    | 14.552         | 65969344 | 288559547 | 23.02        |
| 2    | 16.913         | 65983868 | 288559547 | 23.03        |
| 3    | 22.488         | 78558195 | 288559547 | 26.72        |
| 4    | 28.164         | 78048342 | 288559547 | 27.24        |

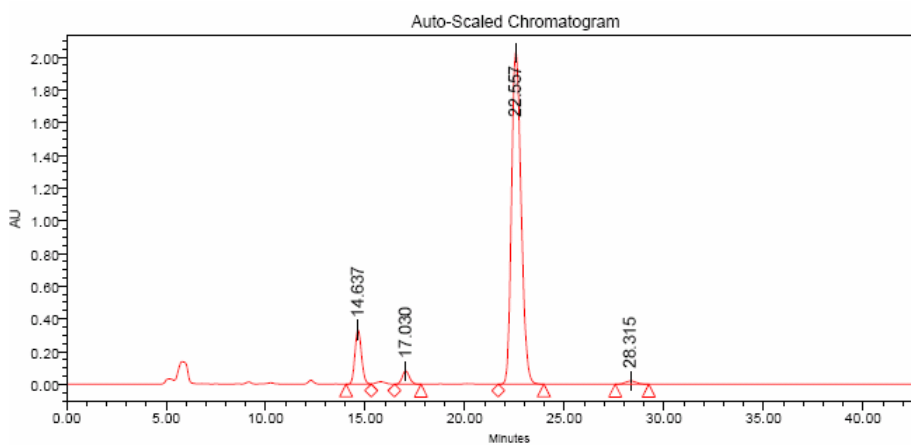

Peak Results

| Name | Retention Time | Area     | Totals   | Area Percent |
|------|----------------|----------|----------|--------------|
| 1    | 14.637         | 7685087  | 78124504 | 9.81         |
| 2    | 17.030         | 2049370  | 78124504 | 2.62         |
| 3    | 22.557         | 67845841 | 78124504 | 86.59        |
| 4    | 28.315         | 764206   | 78124504 | 0.98         |



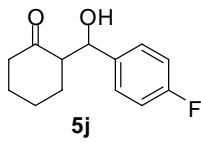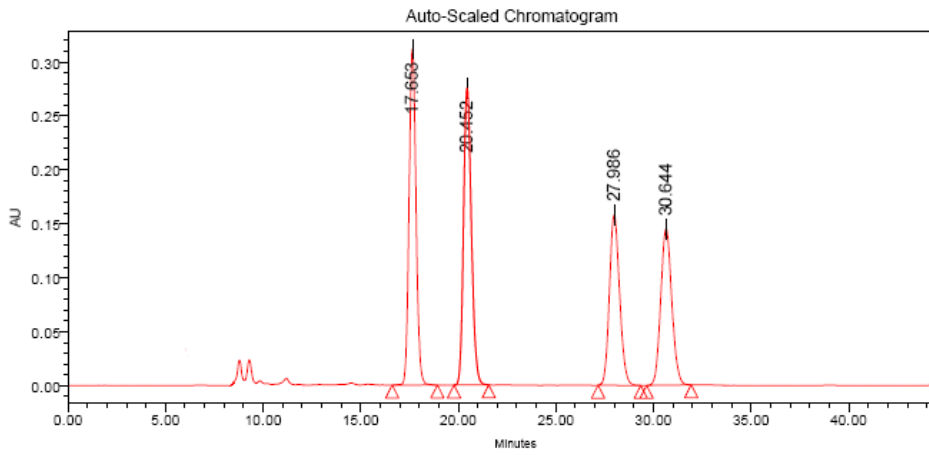

Peak Results

| Name | Retention Time | Area    | Totals   | Area Percent |
|------|----------------|---------|----------|--------------|
| 1    | 17.653         | 7682717 | 28794417 | 28.67        |
| 2    | 20.452         | 7680029 | 28794417 | 28.66        |
| 3    | 27.986         | 5717704 | 28794417 | 21.34        |
| 4    | 30.644         | 5713966 | 28794417 | 21.33        |

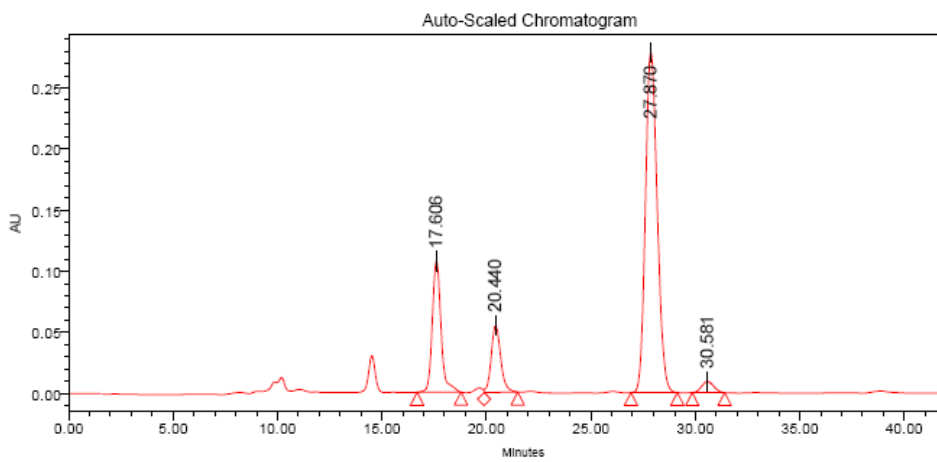

Peak Results

| Name | Retention Time | Area     | Totals   | Area Percent |
|------|----------------|----------|----------|--------------|
| 1    | 17.606         | 3126580  | 16101738 | 19.42        |
| 2    | 20.440         | 1724573  | 16101738 | 10.71        |
| 3    | 27.870         | 10889493 | 16101738 | 67.63        |
| 4    | 30.581         | 361093   | 16101738 | 2.24         |

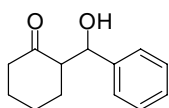

5k

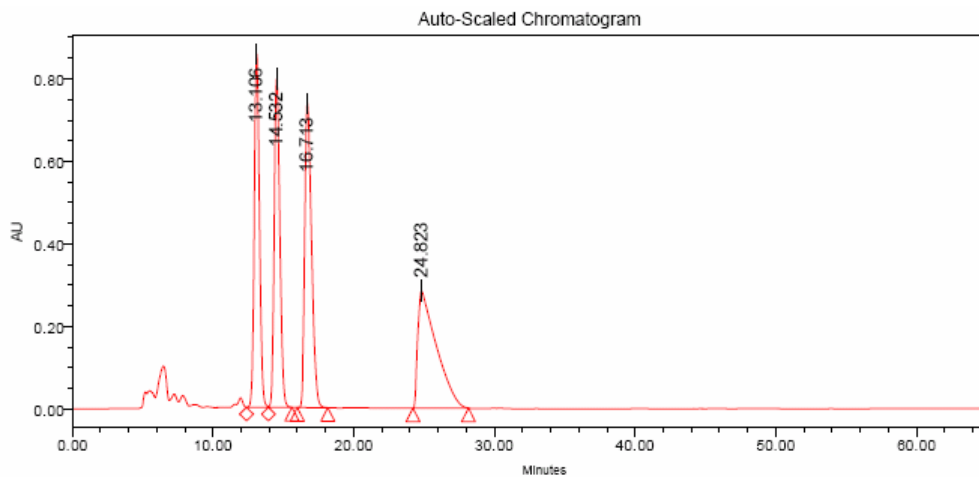

Peak Results

| Name | Retention Time | Area     | Totals   | Area Percent |
|------|----------------|----------|----------|--------------|
| 1    | 13.106         | 21959298 | 94896842 | 23.14        |
| 2    | 14.532         | 22010867 | 94896842 | 23.19        |
| 3    | 16.713         | 24843506 | 94896842 | 26.18        |
| 4    | 24.823         | 26082172 | 94896842 | 27.49        |

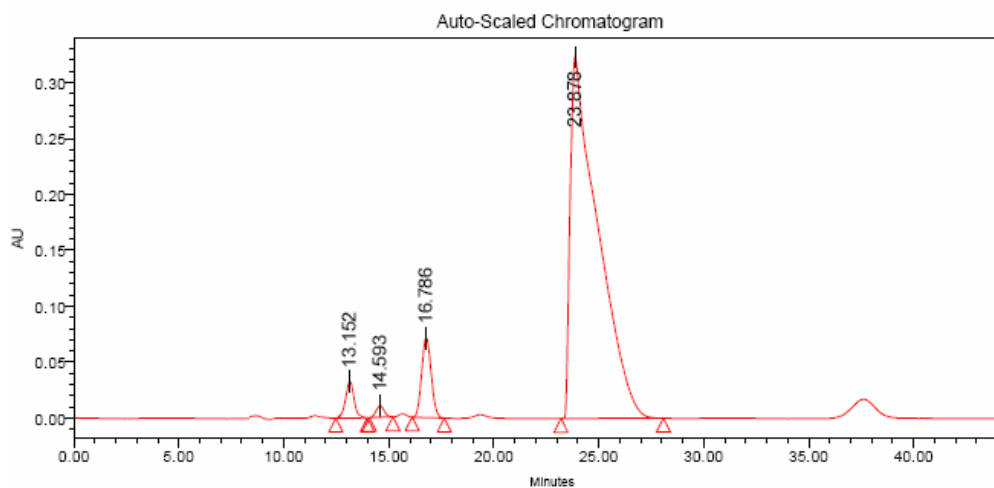

Peak Results

| Name | Retention Time | Area     | Totals   | Area Percent |
|------|----------------|----------|----------|--------------|
| 1    | 13.152         | 918366   | 32959514 | 2.78         |
| 2    | 14.593         | 275671   | 32959514 | 0.84         |
| 3    | 16.786         | 2253980  | 32959514 | 6.84         |
| 4    | 23.878         | 29513497 | 32959514 | 89.54        |

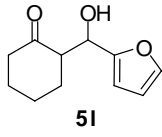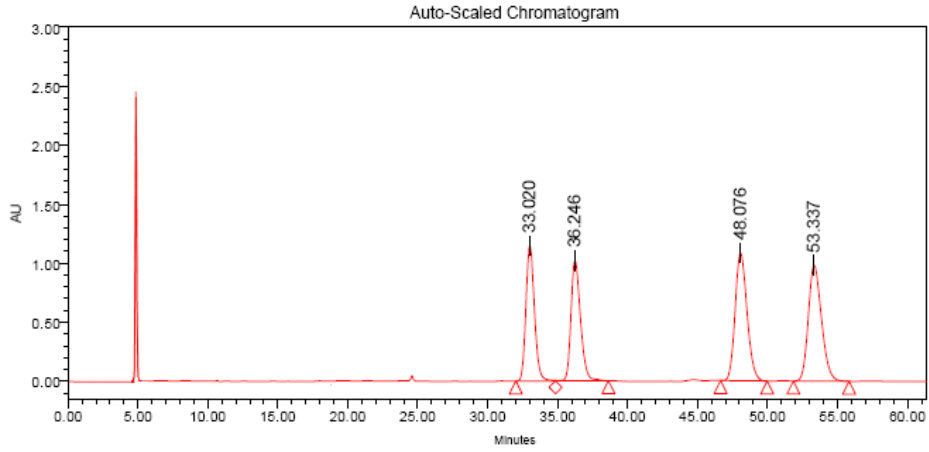

Peak Results

| Name | Retention Time | Area     | Totals    | Area Percent |
|------|----------------|----------|-----------|--------------|
| 1    | 33.020         | 48489244 | 225358994 | 21.52        |
| 2    | 36.246         | 48336675 | 225358994 | 21.45        |
| 3    | 48.076         | 64042388 | 225358994 | 28.42        |
| 4    | 53.337         | 64488686 | 225358994 | 28.62        |

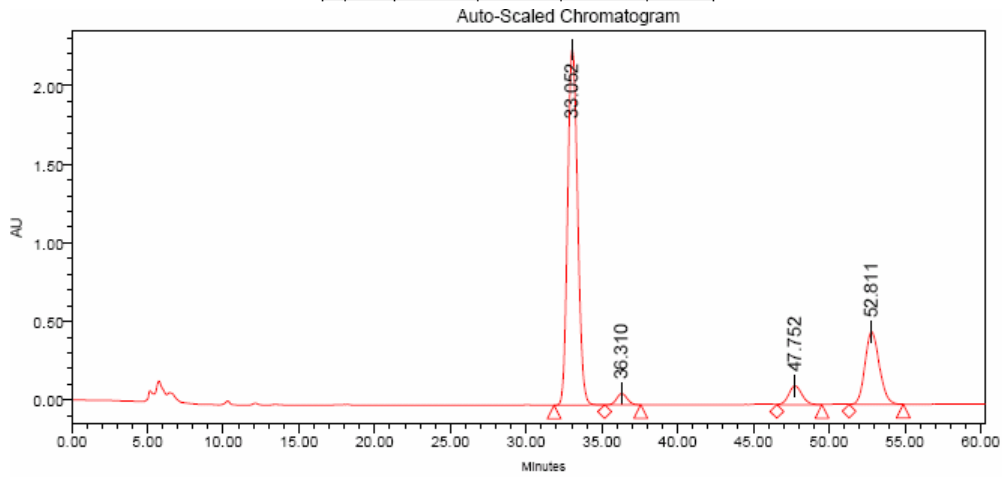

Peak Results

| Name | Retention Time | Area      | Totals    | Area Percent |
|------|----------------|-----------|-----------|--------------|
| 1    | 33.052         | 103370680 | 144432580 | 71.57        |
| 2    | 36.310         | 3457452   | 144432580 | 2.39         |
| 3    | 47.752         | 7165786   | 144432580 | 4.96         |
| 4    | 52.811         | 30438662  | 144432580 | 21.07        |

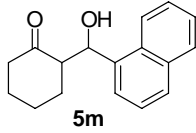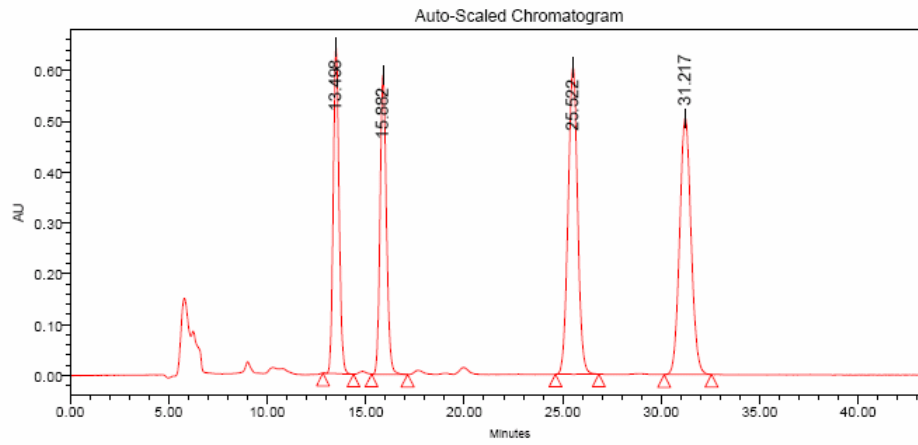

Peak Results

| Name | Retention Time | Area     | Totals   | Area Percent |
|------|----------------|----------|----------|--------------|
| 1    | 13.498         | 13161418 | 67036965 | 19.63        |
| 2    | 15.882         | 13312514 | 67036965 | 19.86        |
| 3    | 25.522         | 20249230 | 67036965 | 30.21        |
| 4    | 31.217         | 20313802 | 67036965 | 30.30        |

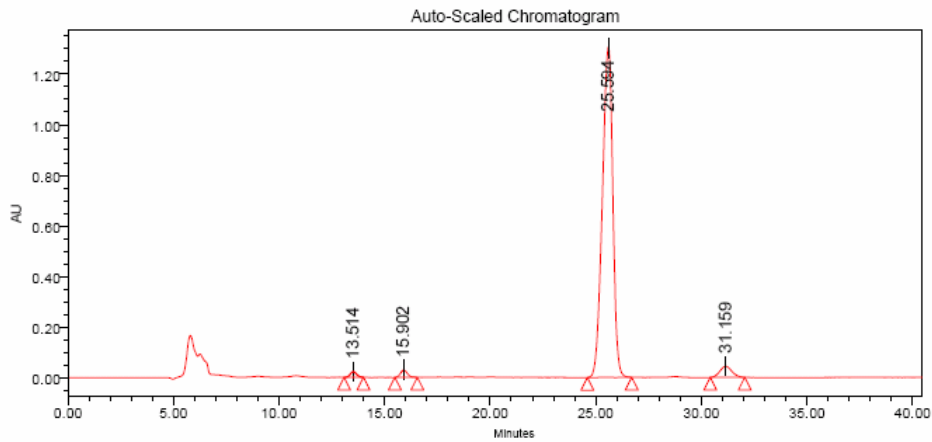

Peak Results

| Name | Retention Time | Area     | Totals   | Area Percent |
|------|----------------|----------|----------|--------------|
| 1    | 13.514         | 473697   | 47744785 | 0.99         |
| 2    | 15.902         | 657204   | 47744785 | 1.38         |
| 3    | 25.564         | 44909553 | 47744785 | 94.06        |
| 4    | 31.159         | 1704331  | 47744785 | 3.57         |

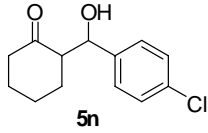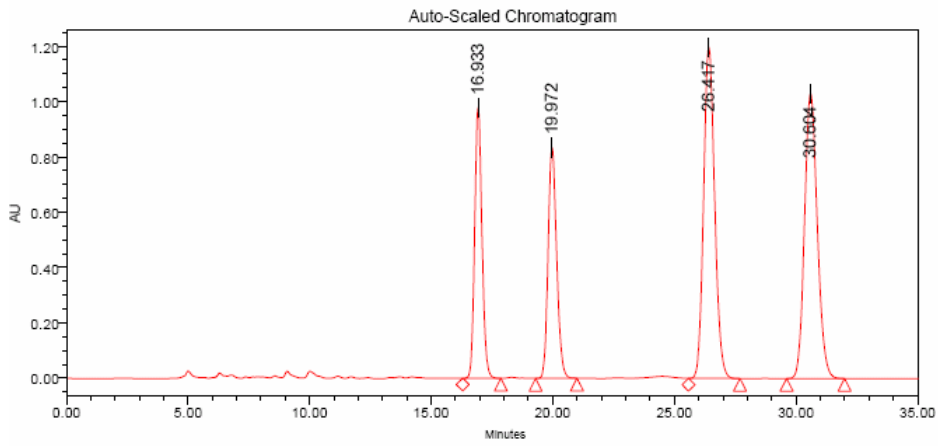

Peak Results

| Name | Retention Time | Area     | Totals    | Area Percent |
|------|----------------|----------|-----------|--------------|
| 1    | 16.933         | 20407955 | 116218174 | 17.58        |
| 2    | 19.972         | 20341445 | 116218174 | 17.50        |
| 3    | 26.417         | 37827956 | 116218174 | 32.55        |
| 4    | 30.604         | 37640819 | 116218174 | 32.39        |

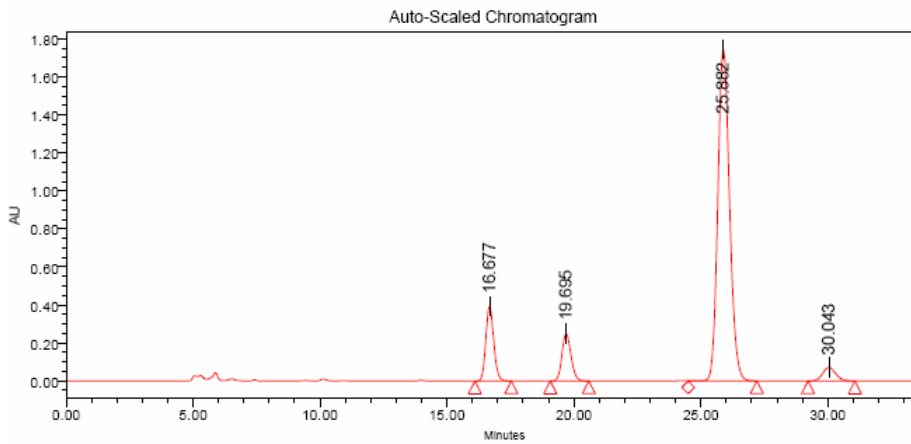

Peak Results

| Name | Retention Time | Area     | Totals   | Area Percent |
|------|----------------|----------|----------|--------------|
| 1    | 16.677         | 8504871  | 73302435 | 11.80        |
| 2    | 19.695         | 6168142  | 73302435 | 8.41         |
| 3    | 25.882         | 56078915 | 73302435 | 76.50        |
| 4    | 30.043         | 2552507  | 73302435 | 3.48         |

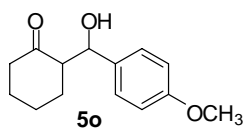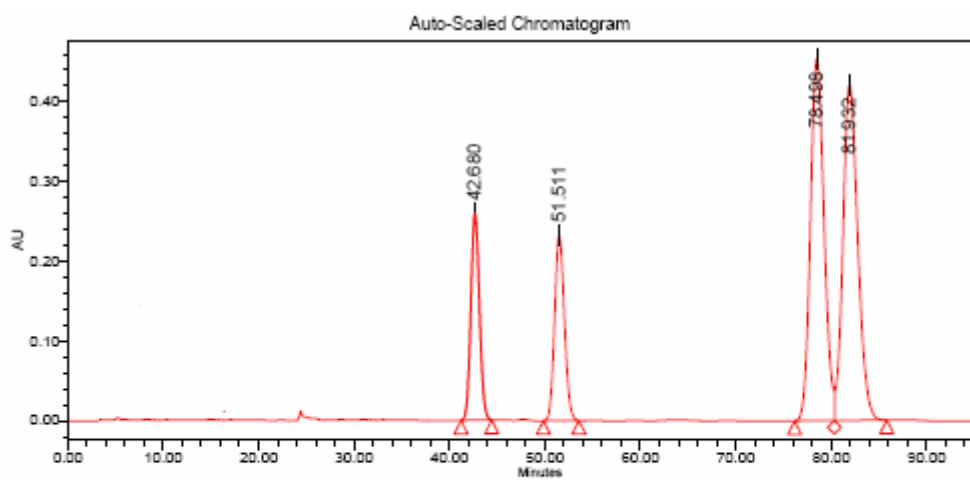

Peak Results

| Name | Retention Time | Area     | Totals    | Area Percent |
|------|----------------|----------|-----------|--------------|
| 1    | 42.680         | 16275625 | 123455828 | 13.18        |
| 2    | 51.511         | 16641384 | 123455828 | 13.48        |
| 3    | 78.488         | 45052942 | 123455828 | 36.49        |
| 4    | 81.932         | 45485668 | 123455828 | 36.84        |

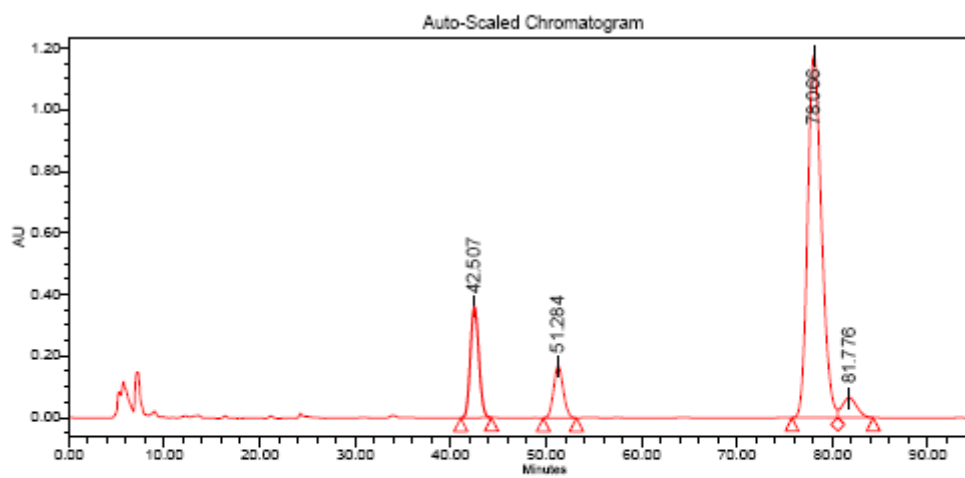

Peak Results

| Name | Retention Time | Area      | Totals    | Area Percent |
|------|----------------|-----------|-----------|--------------|
| 1    | 42.507         | 22408286  | 160129827 | 13.99        |
| 2    | 51.284         | 11851164  | 160129827 | 7.40         |
| 3    | 78.066         | 118967193 | 160129827 | 74.29        |
| 4    | 81.776         | 6903184   | 160129827 | 4.31         |

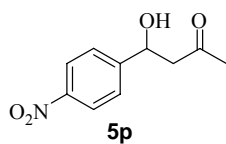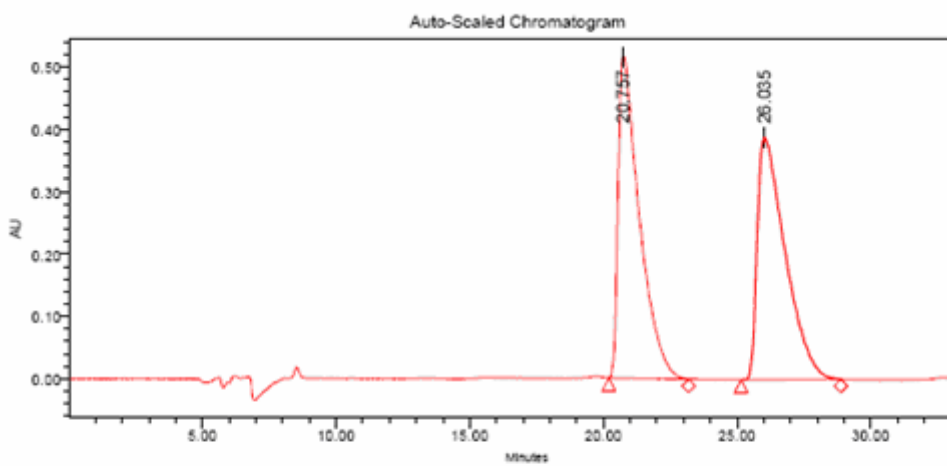

Peak Results

| Name | Retention Time | Area     | Totals   | Area Percent |
|------|----------------|----------|----------|--------------|
| 1    | 20.757         | 28475568 | 56673053 | 50.33        |
| 2    | 26.035         | 28097495 | 56673053 | 49.67        |

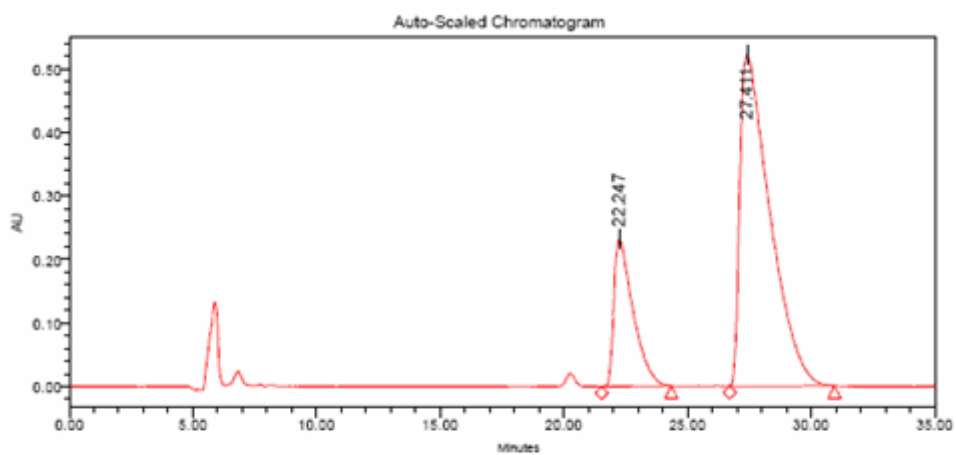

Peak Results

| Name | Retention Time | Area     | Area Percent | Totals   |
|------|----------------|----------|--------------|----------|
| 1    | 22.247         | 12455410 | 22.04        | 56500871 |
| 2    | 27.411         | 44045461 | 77.96        | 56500871 |
